# Supplementary material for: Application of a Mathematical Model to Describe the Effects of Chlorpyrifos on Caenorhabditis elegans Development
Source: PubMed Central journal article supplement (PMC2737145; doi:10.1371/journal.pone.0007024), 2009-09-15

# **Supplementary File 3 - Observations and predictions of $\log(\text{TOF})$ across all aspiration times and chlorpyrifos concentrations.**

Observed frequencies ( $\log(\text{TOF})$ ) of all aspirated measurements (red) and model estimated frequencies of maturing nematodes (blue). The distribution of the loaded nematodes is shown in green. Extraneous noise was modeled as a lognormal distribution (black). Black vertical lines indicate change points, where growth rates changed.

dose level is 0

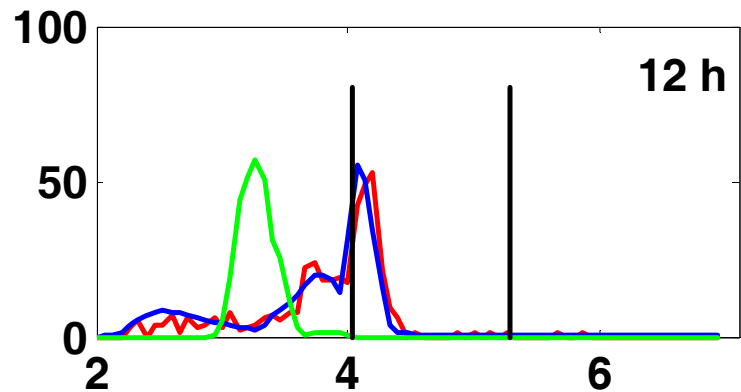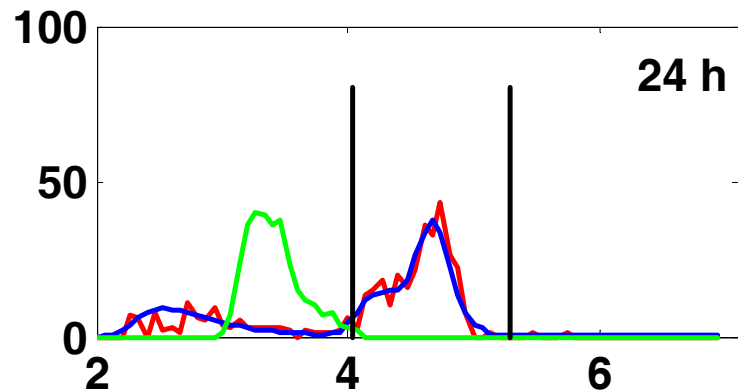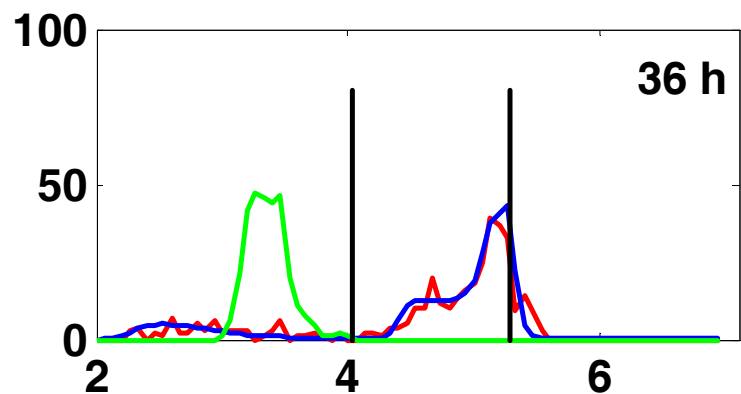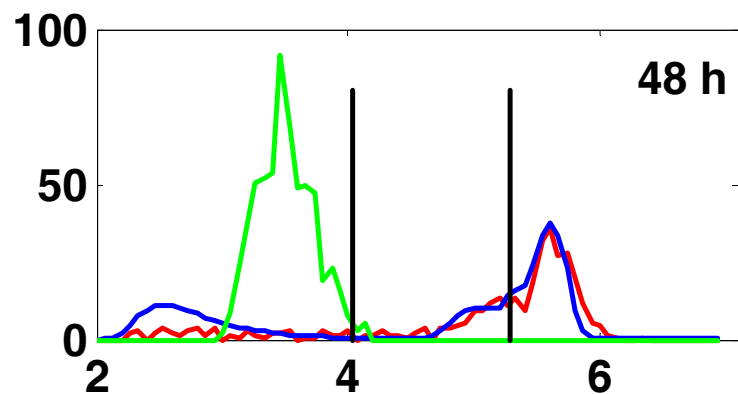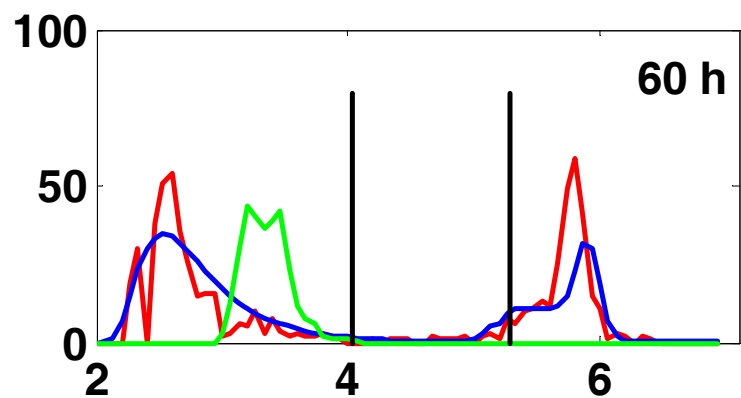

Suppl Fig 3a

log(TOF) units

dose level is 0

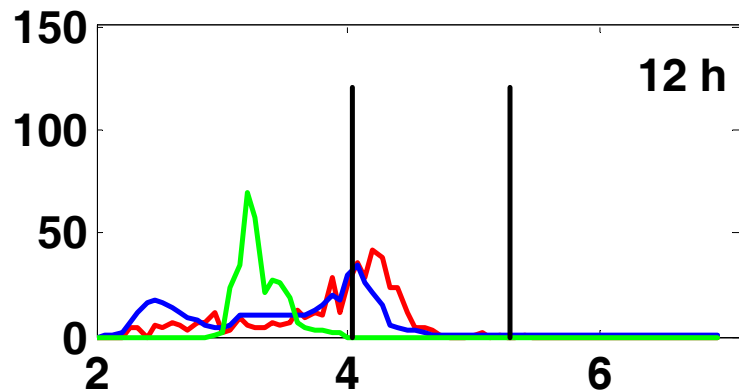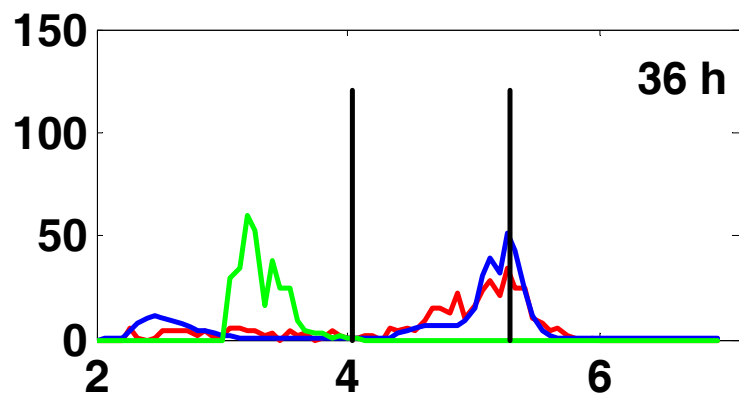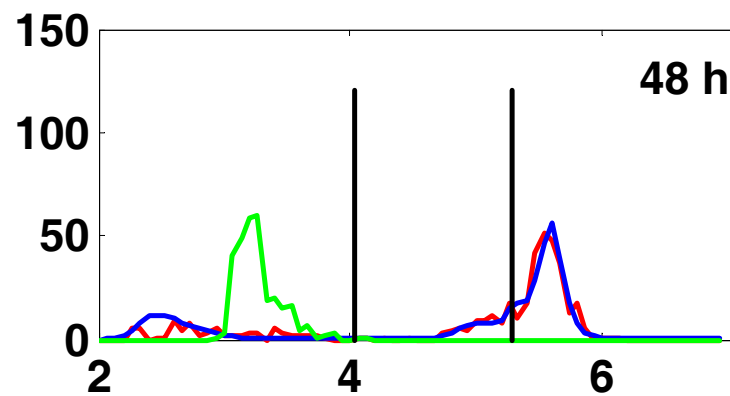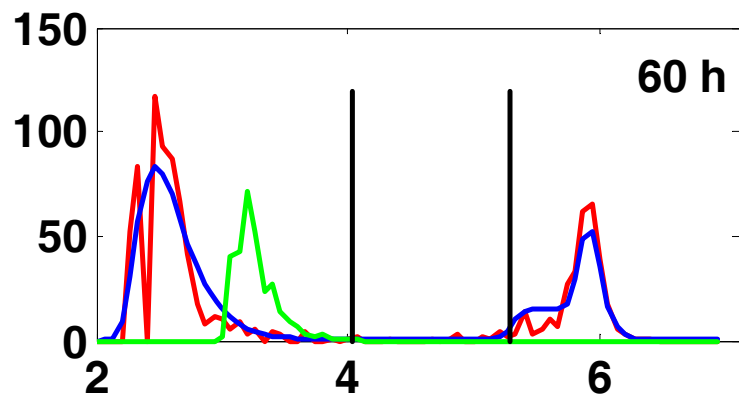

Suppl Fig 3b

log(TOF) units

dose level is 0.5

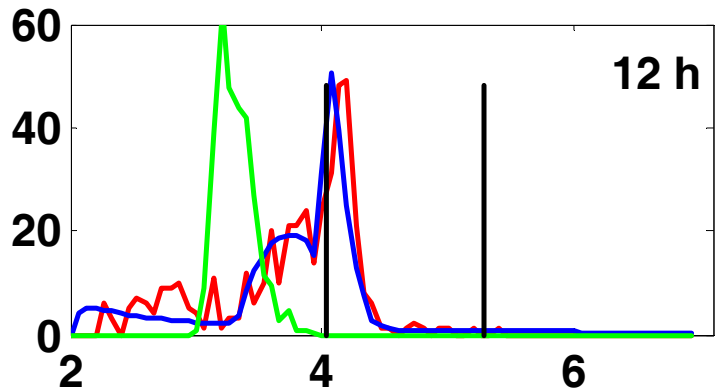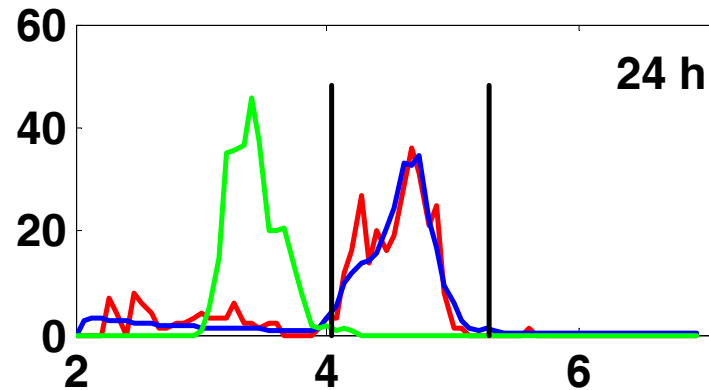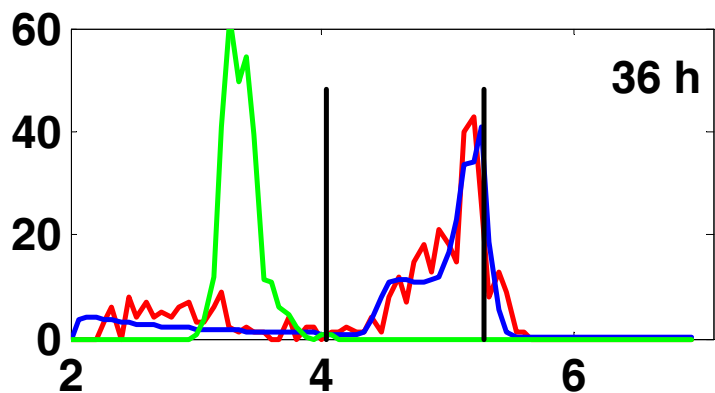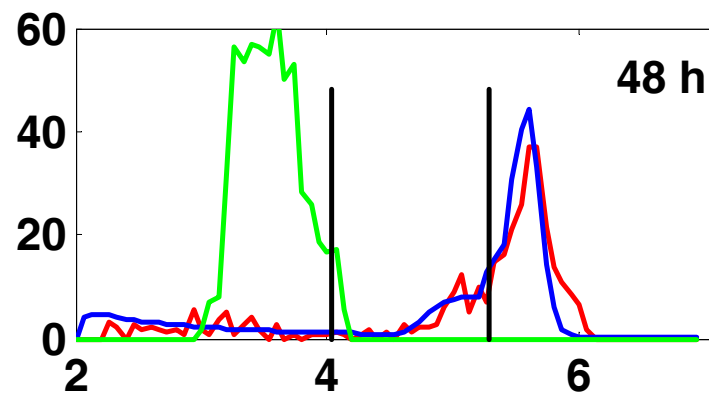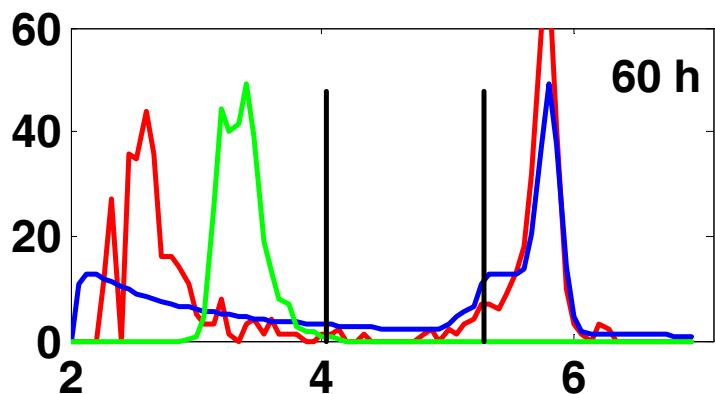

dose level is 0.75

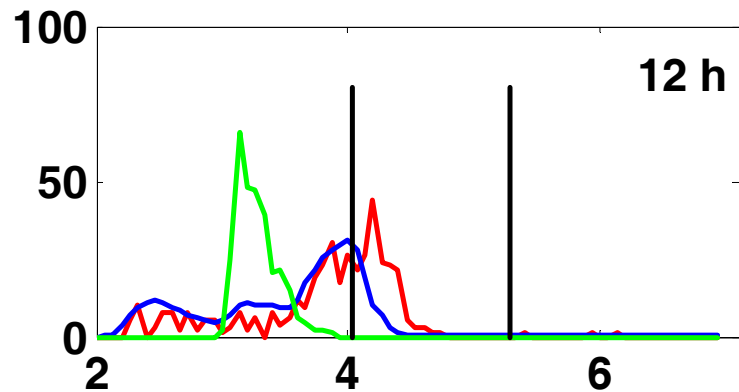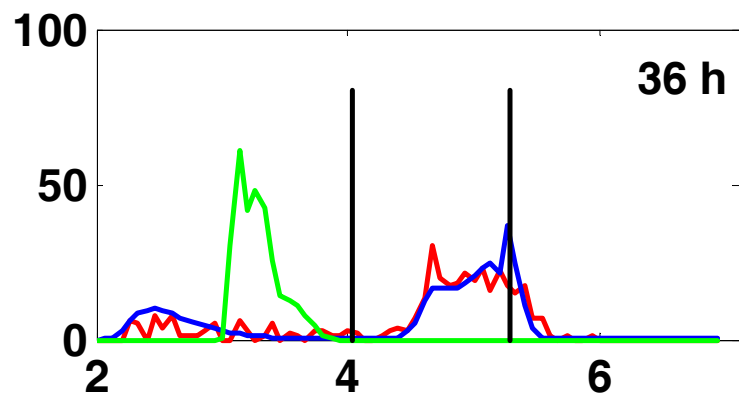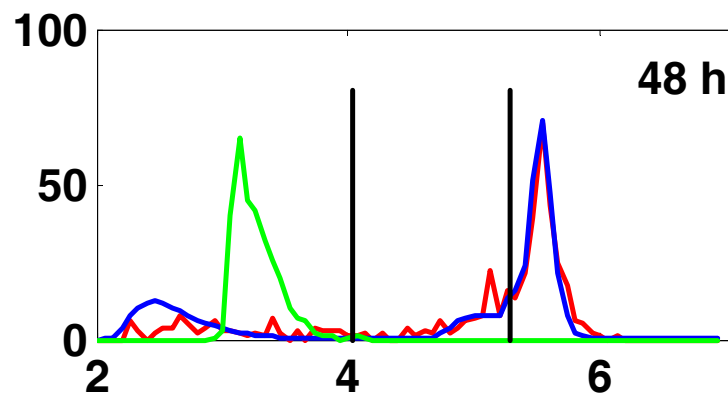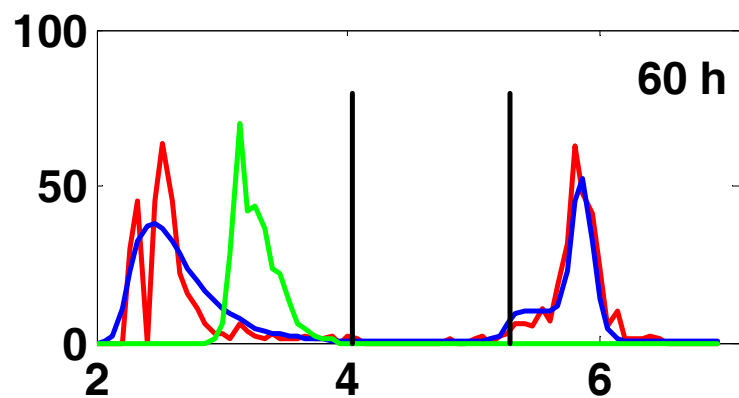

Suppl Fig 3d

log(TOF) units

dose level is 5

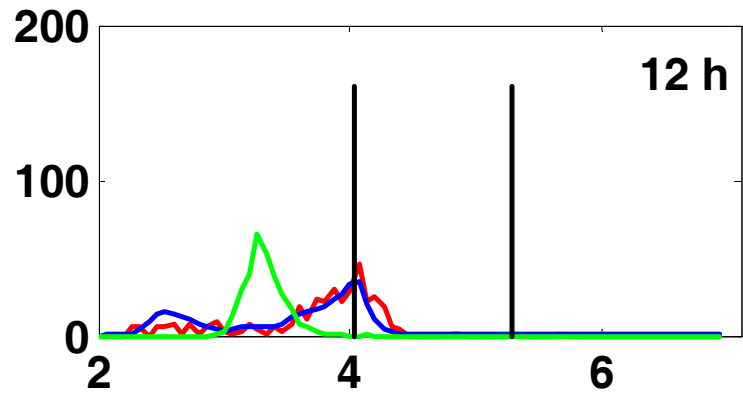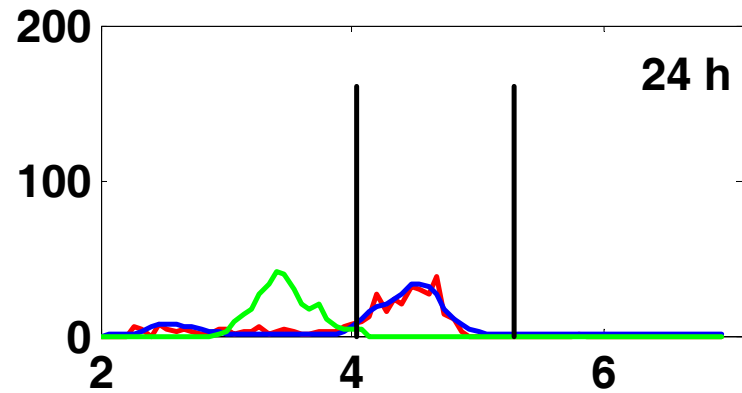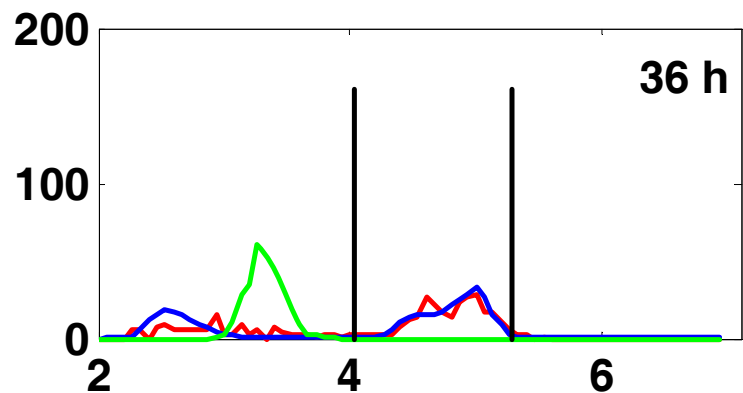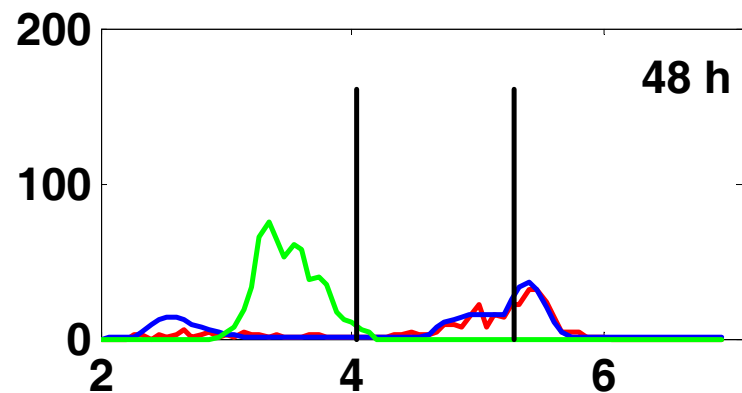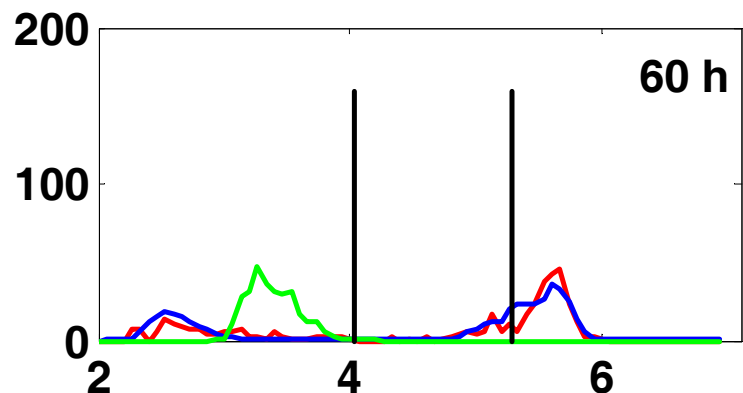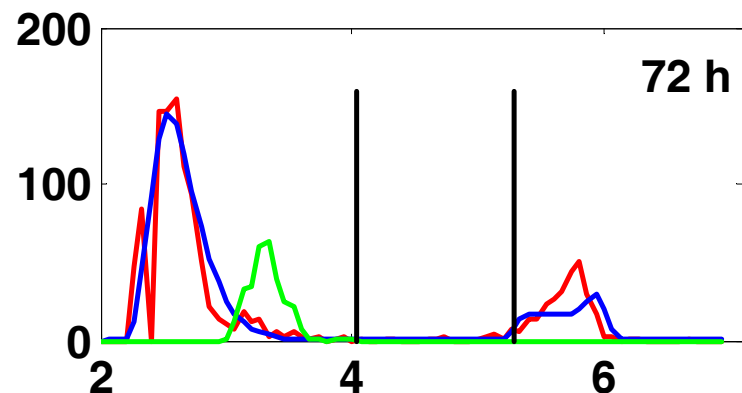

dose level is 7.5

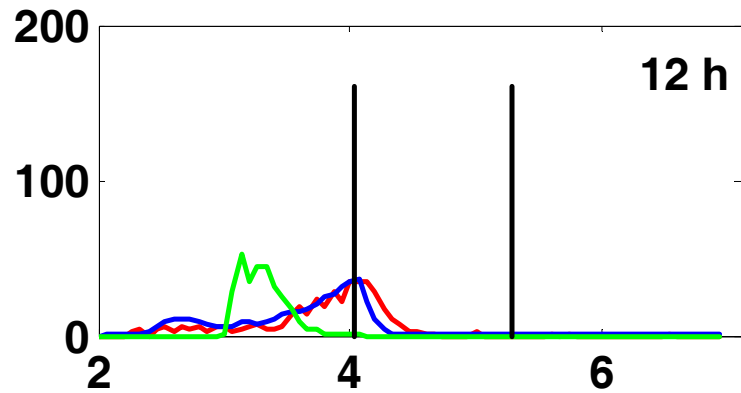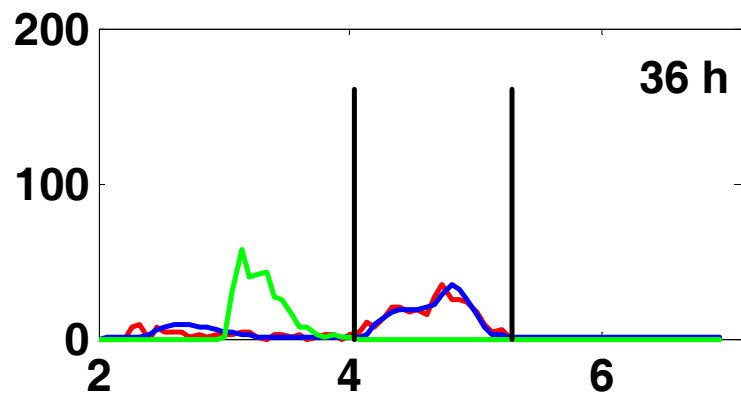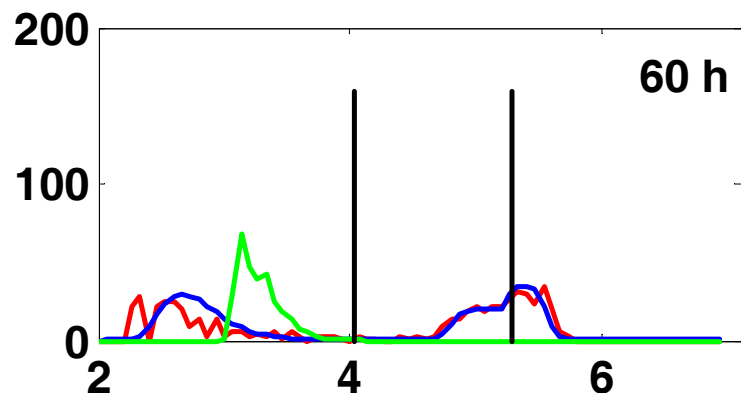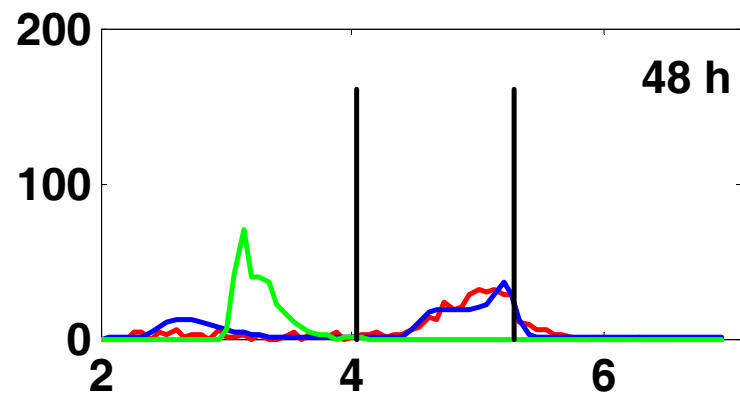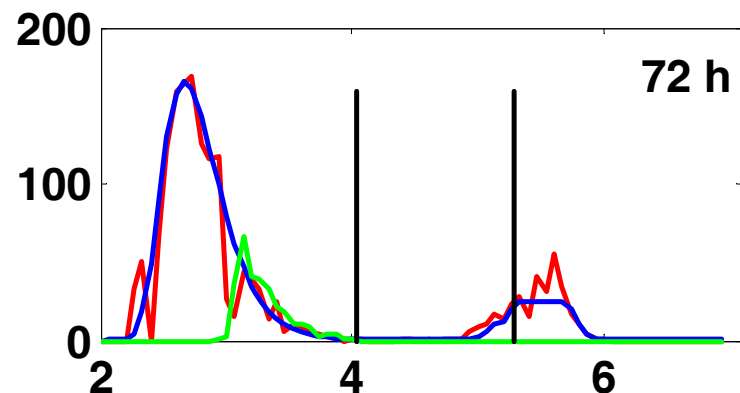

dose level is 15

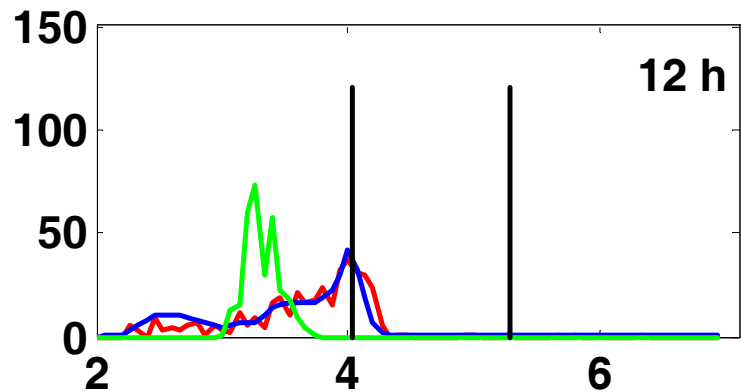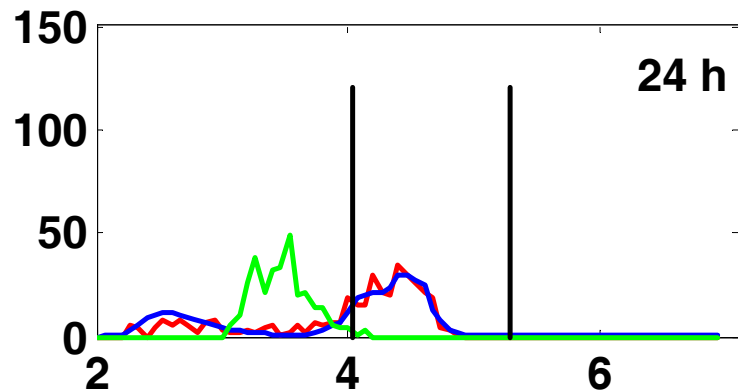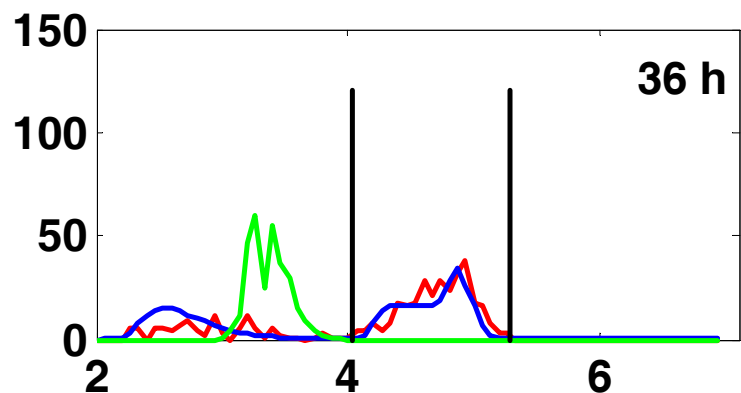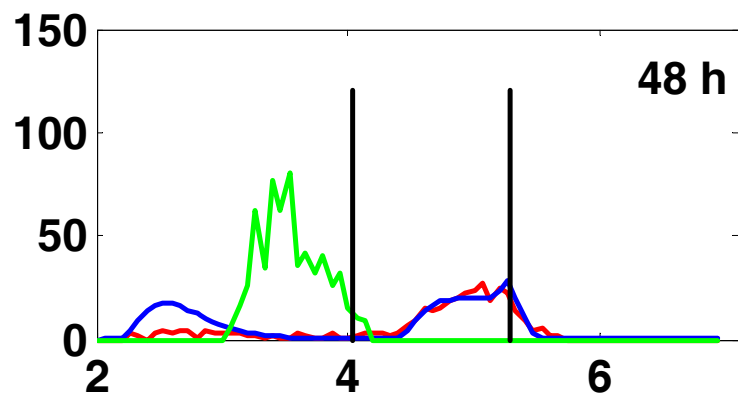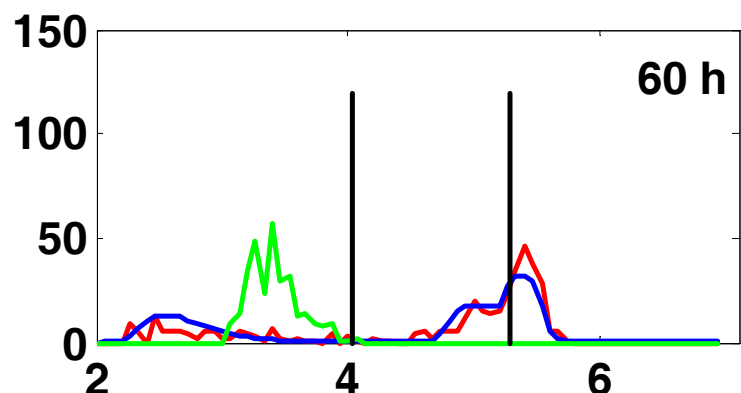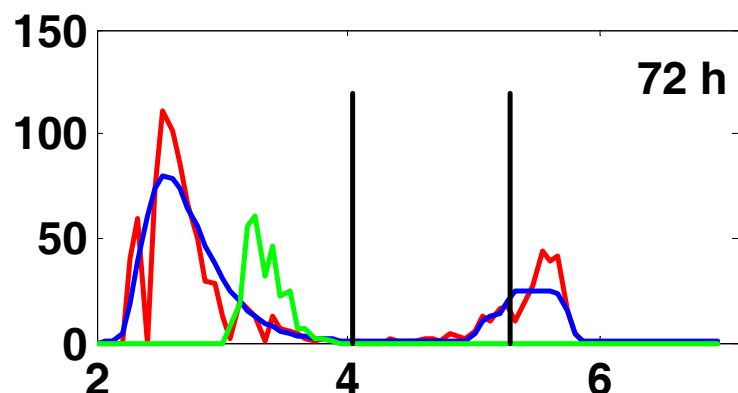

Suppl Fig 3g

log(TOF) units

log(TOF) units



dose level is 22.5

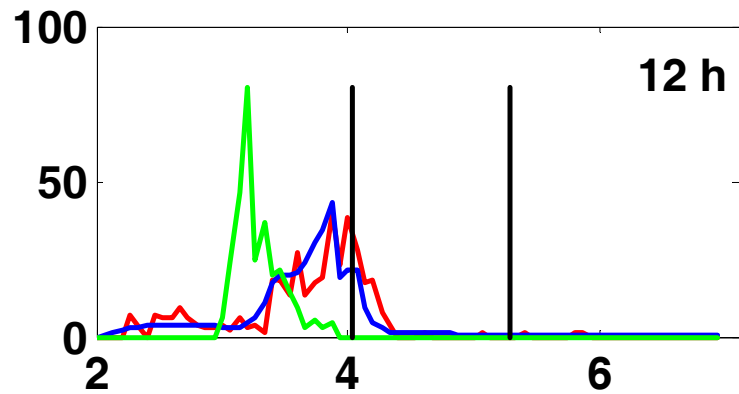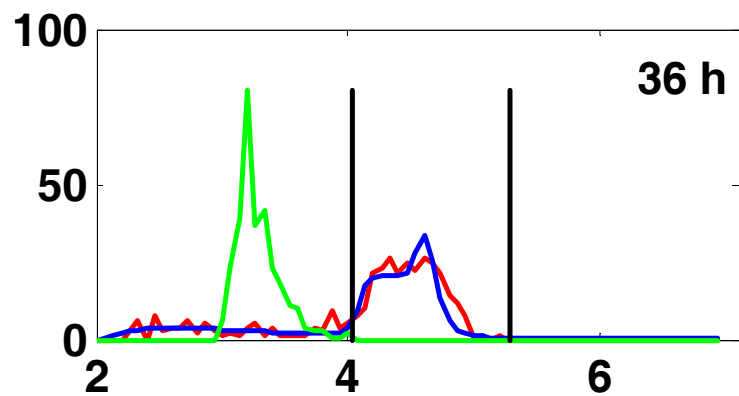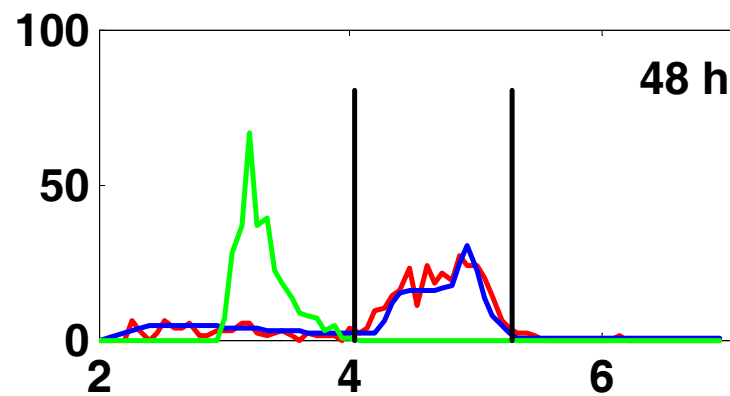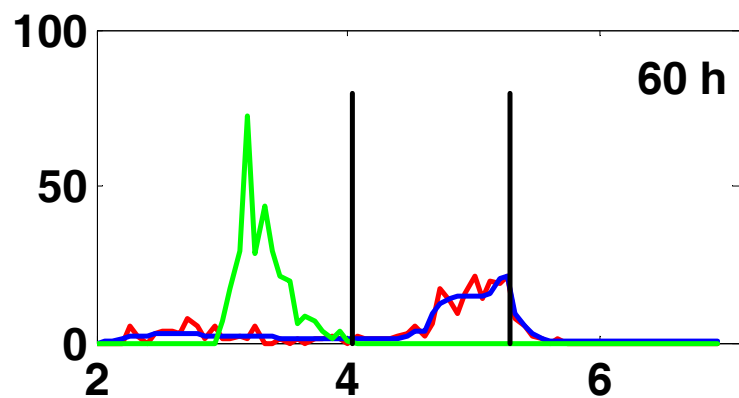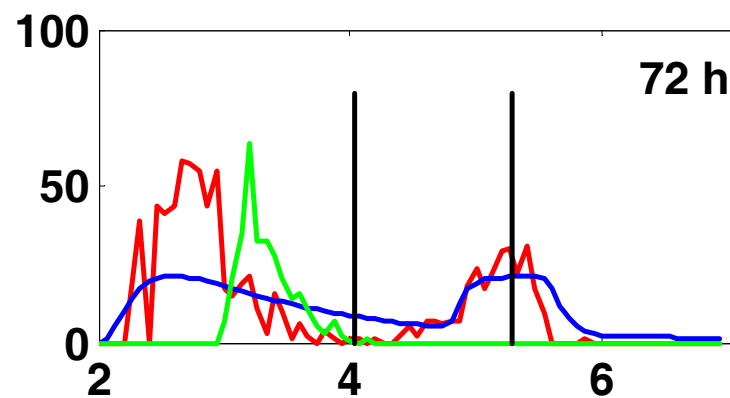

Suppl Fig 3h

log(TOF) units

log(TOF) units

dose level is 45

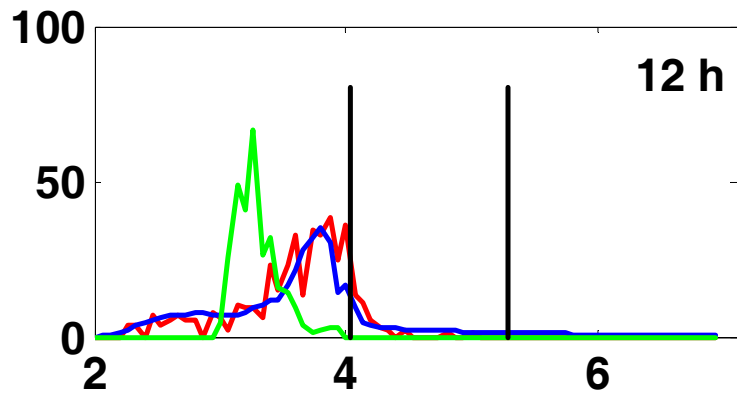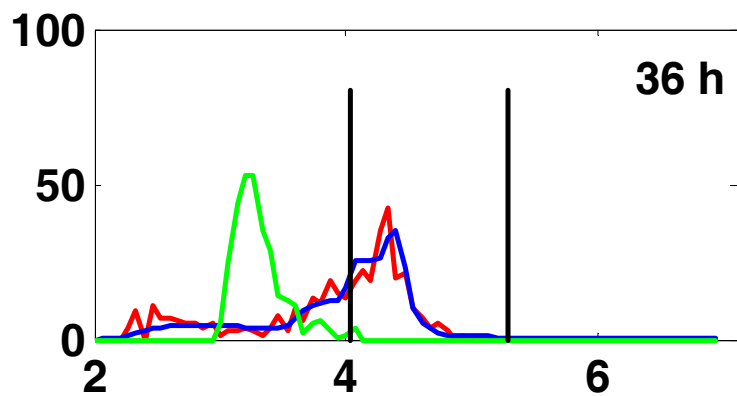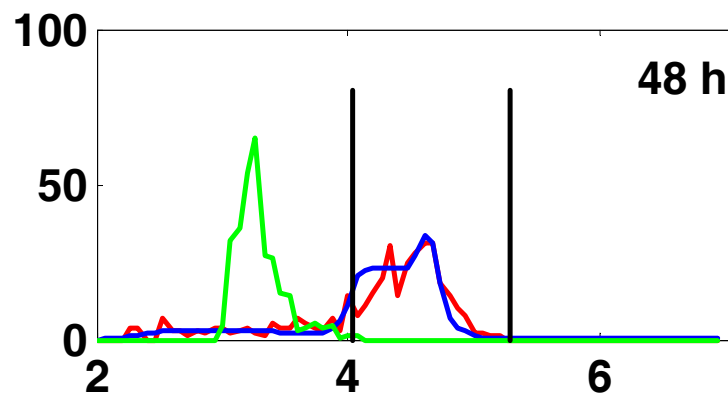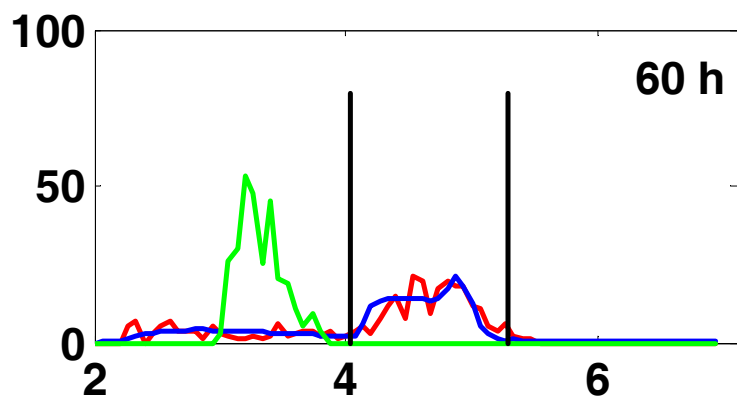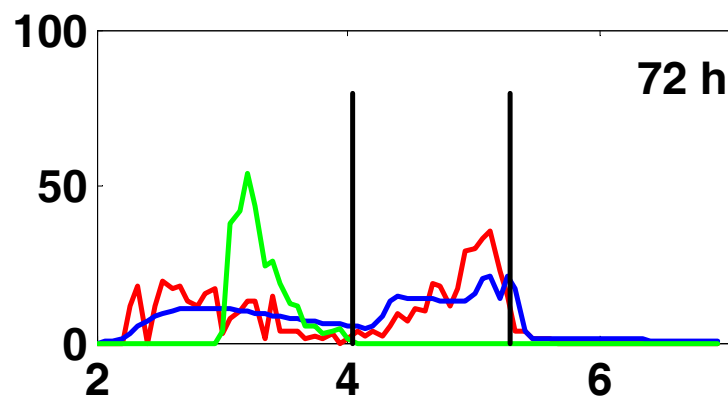

Supplement: pone.0007024.s003.pdf [file pone.0007024.s003.pdf]
