# Supplementary material for: Application of a Mathematical Model to Describe the Effects of Chlorpyrifos on Caenorhabditis elegans Development
Source: PubMed Central journal article supplement (PMC2737145; doi:10.1371/journal.pone.0007024), 2009-09-15
Supplement: pone.0007024.s001.pdf [file pone.0007024.s001.pdf]

# Supplementary File 1 - Observations of chlorpyrifos effects on *C. elegans* growth.

Frequency diagrams of (a) log(EXT) and (b) log(TOF) observations on nematodes exposed to 0, 0.75, 7.5, 22.5, 45, and 75  $\mu$ M chlorpyrifos at 12, 24, 36, 48, 60, and 72 h.

Vertical lines divide the growth response into 3 sections: initial growth from starved L1s, larval growth from L2-L4, and adult growth.

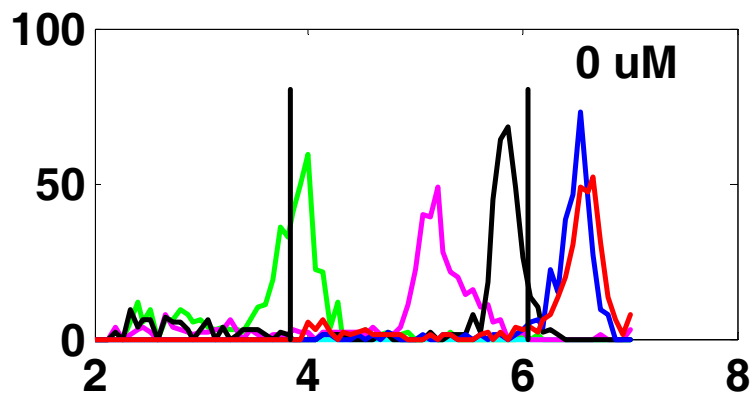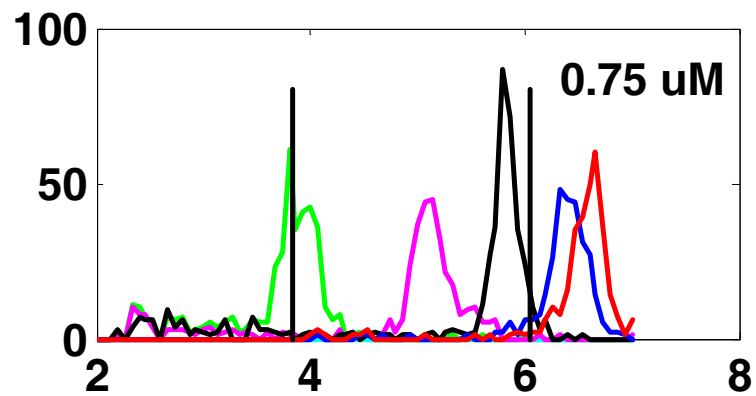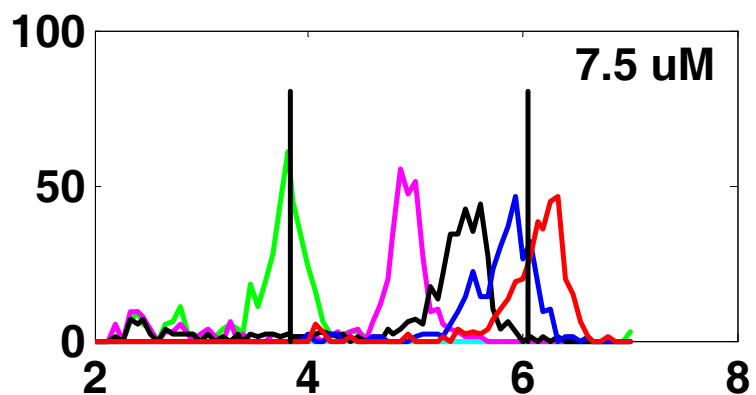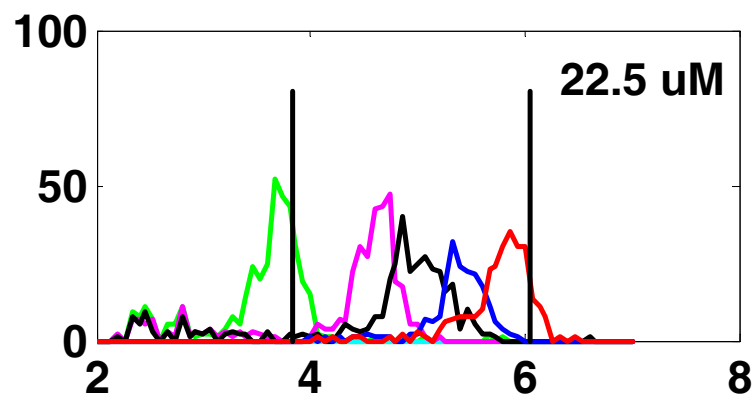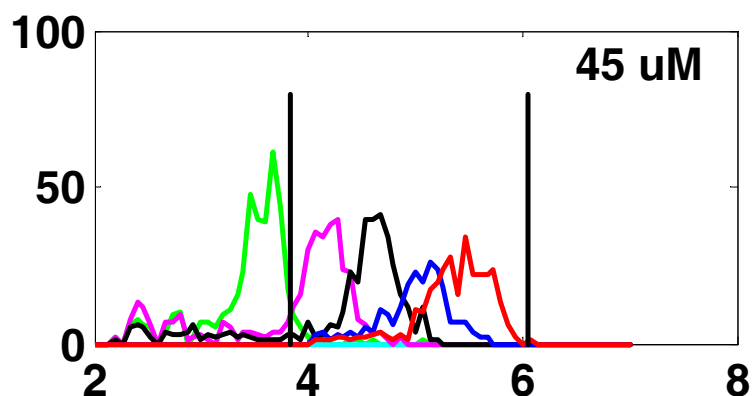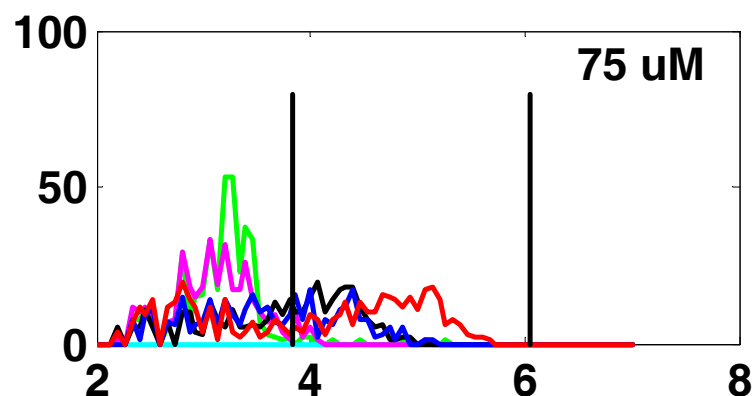

Suppl Fig 1a

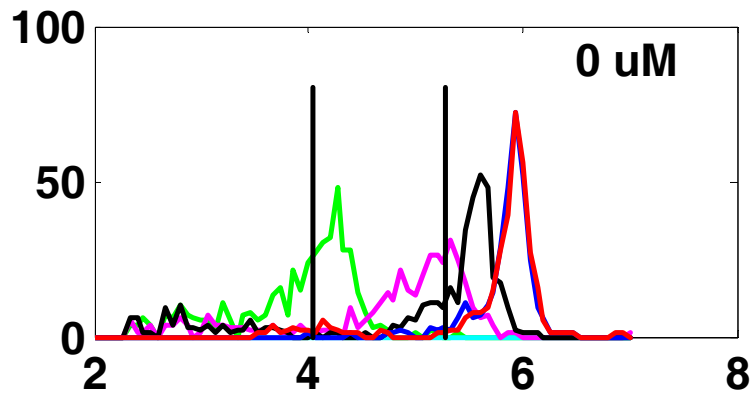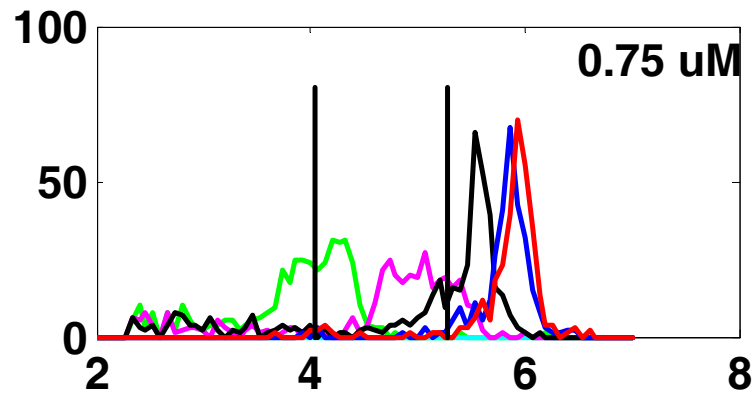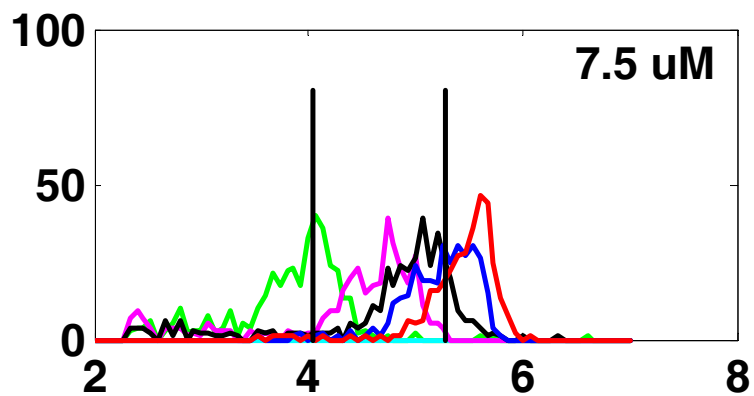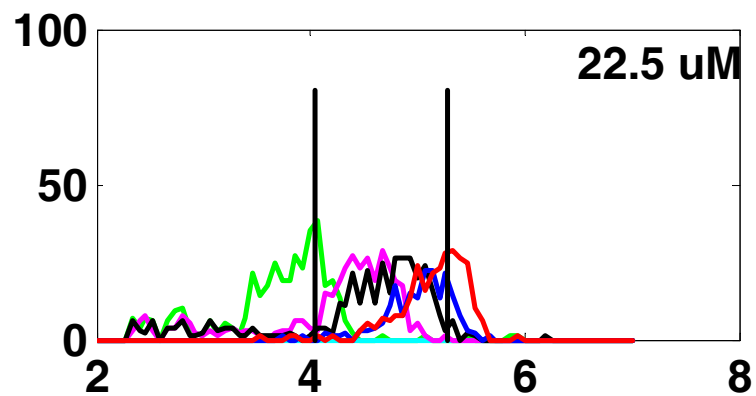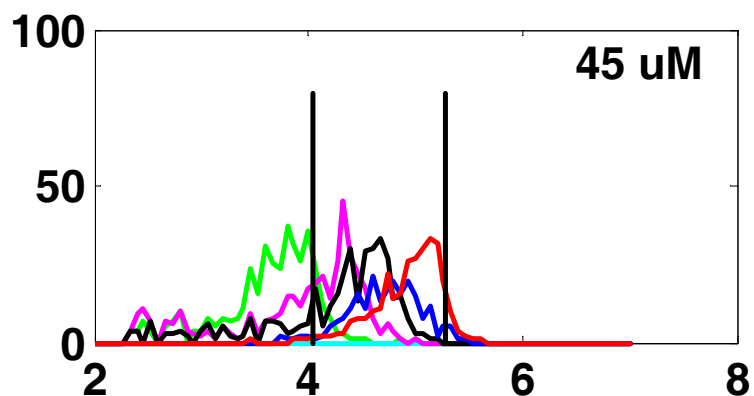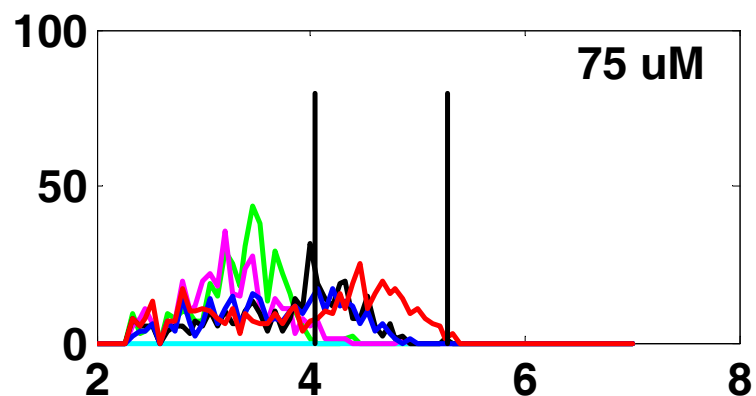

Suppl Fig 1b
