# Supplementary material for: Application of a Mathematical Model to Describe the Effects of Chlorpyrifos on Caenorhabditis elegans Development
Source: PubMed Central journal article supplement (PMC2737145; doi:10.1371/journal.pone.0007024), 2009-09-15
Supplement: pone.0007024.s002.pdf [file pone.0007024.s002.pdf]

# **Supplementary File 2 - Observations and predictions of $\log(\text{EXT})$ across all aspiration times and chlorpyrifos concentrations.**

Observed frequencies ( $\log(\text{EXT})$ ) of all aspirated measurements (red) and model estimated frequencies of maturing nematodes (blue). The distribution of the loaded nematodes is shown in green. Extraneous noise was modeled as a lognormal distribution (black). Black vertical lines indicate change points, where growth rates changed.

dose level is 0

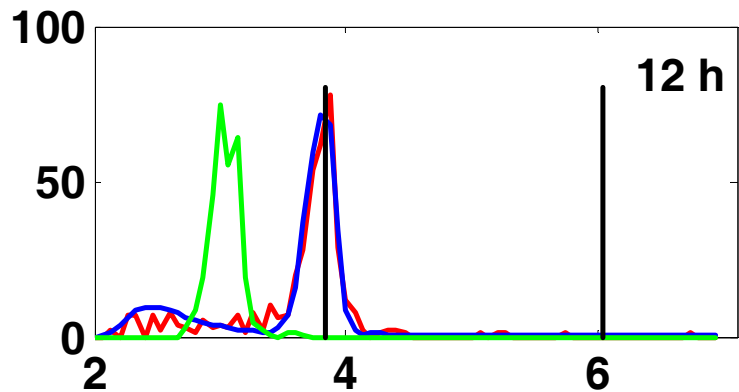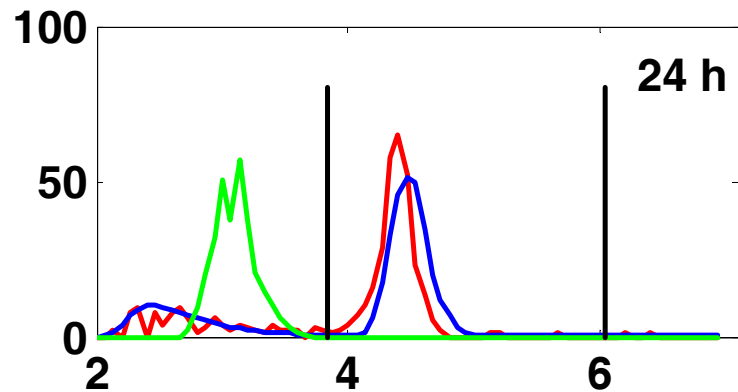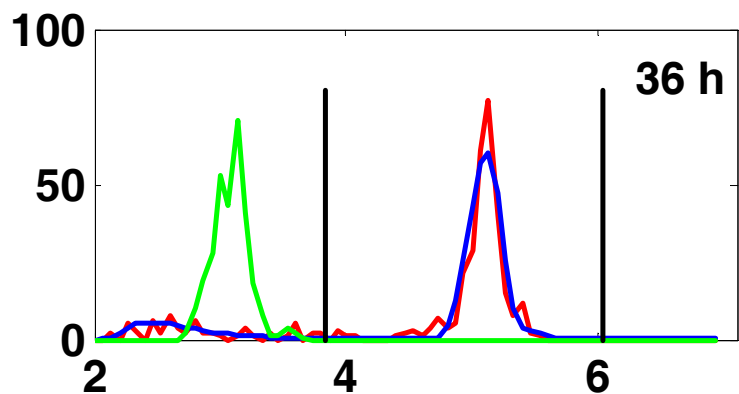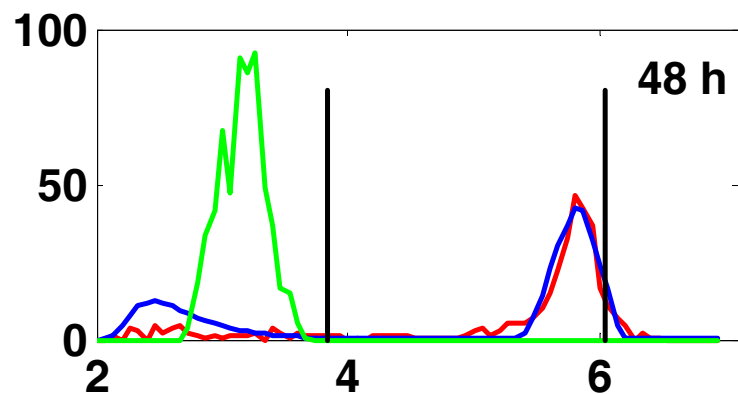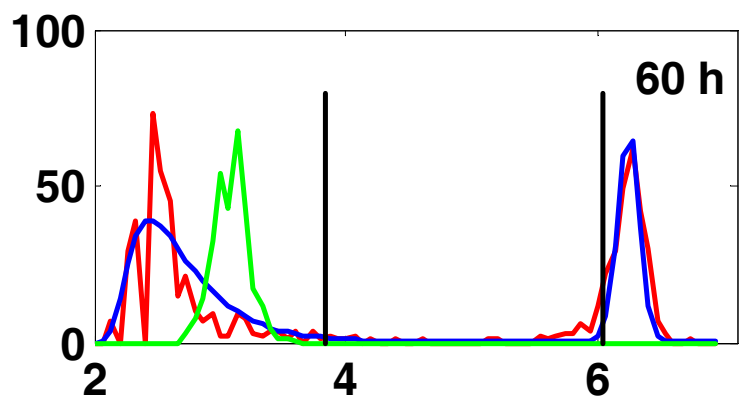

Suppl Fig 2a

log(EXT) units

dose level is 0

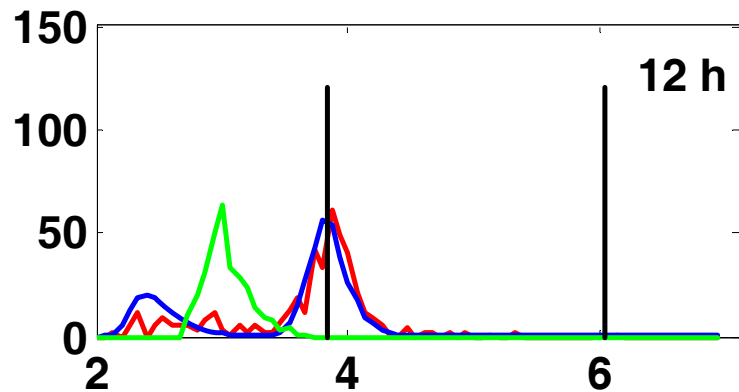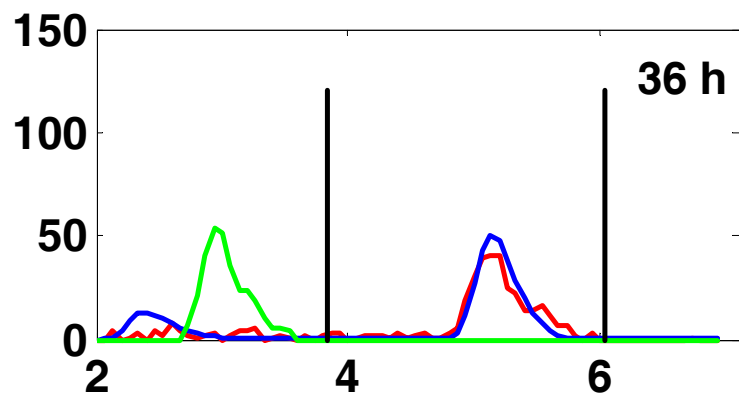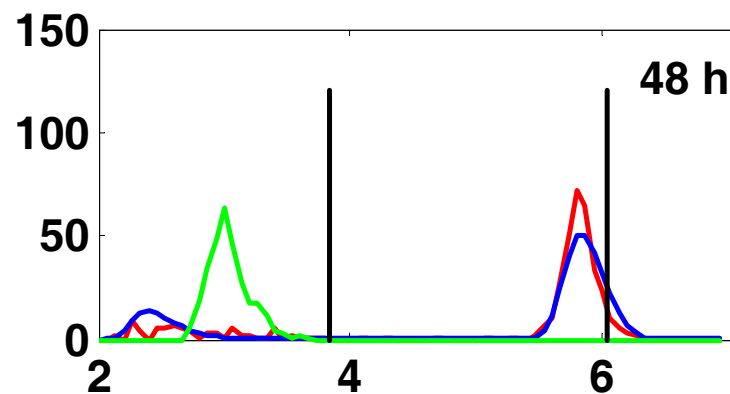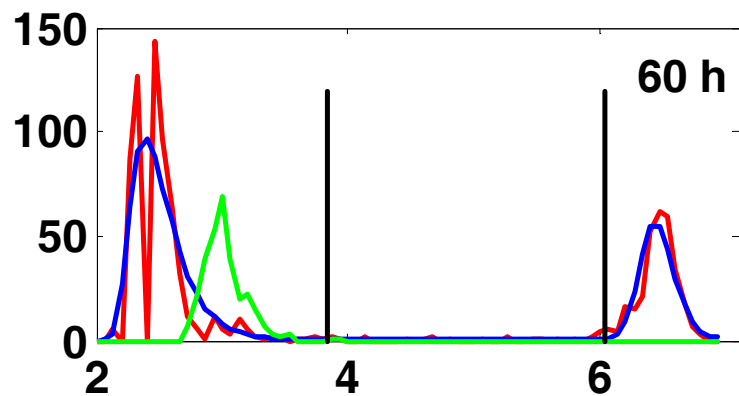

Suppl Fig 2b

log(EXT) units

dose level is 0.5

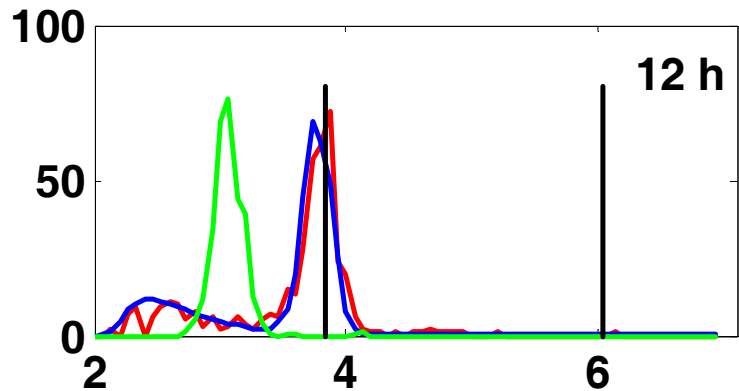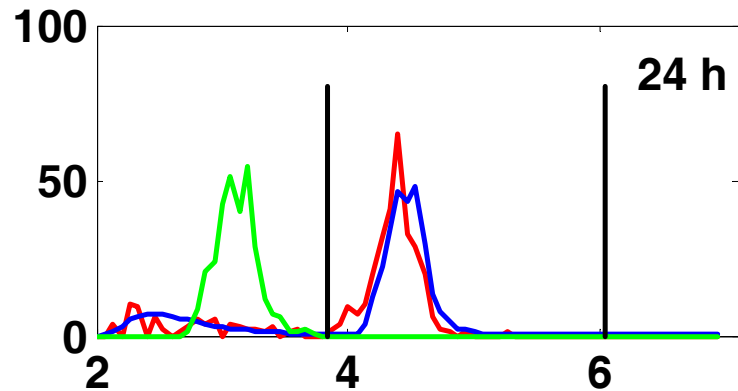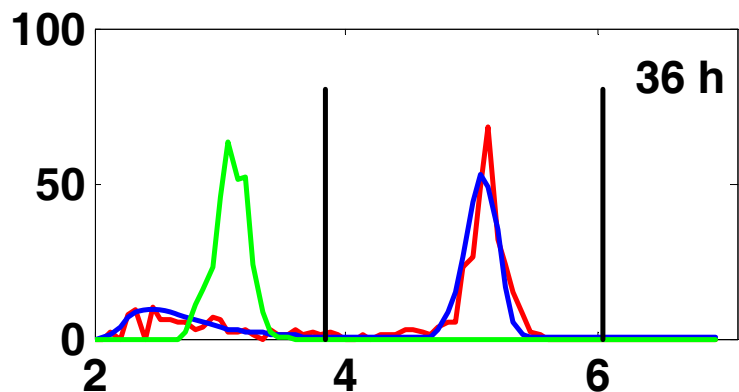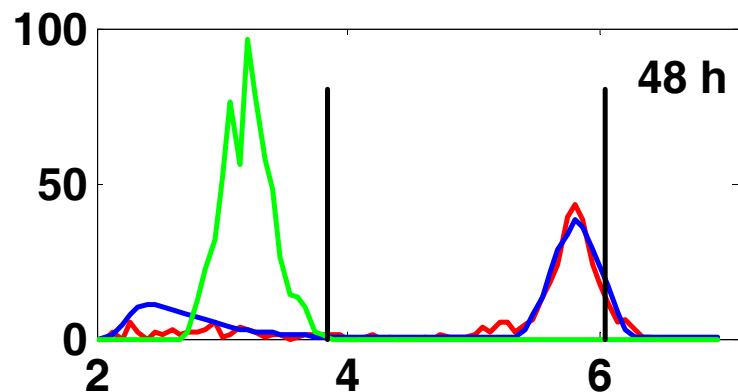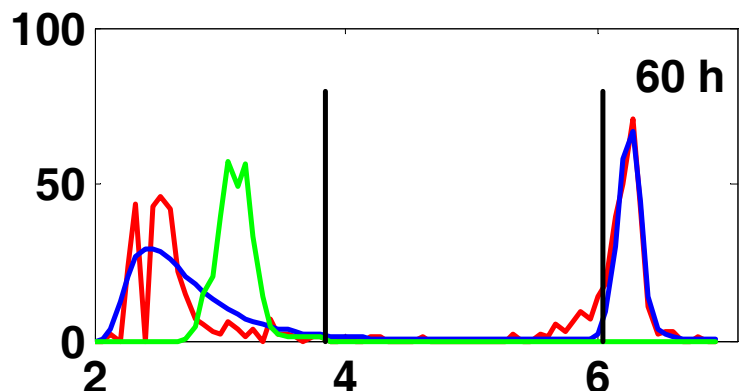

dose level is 0.75

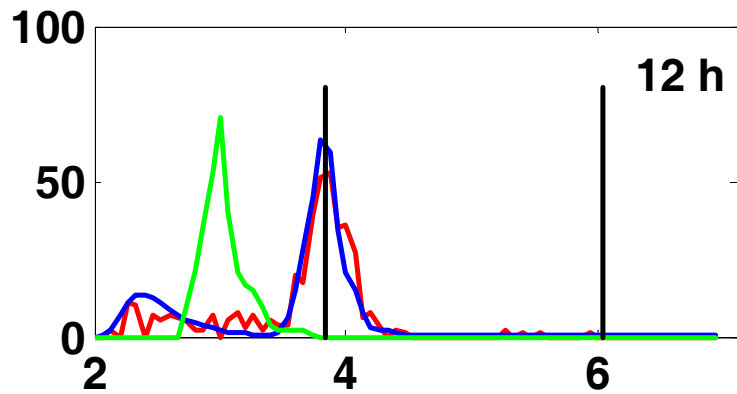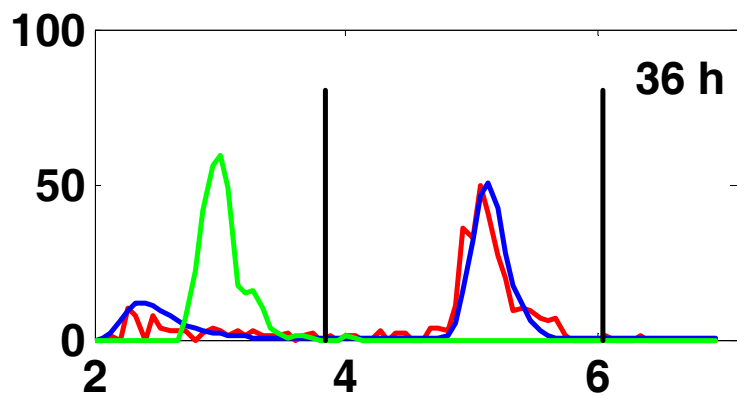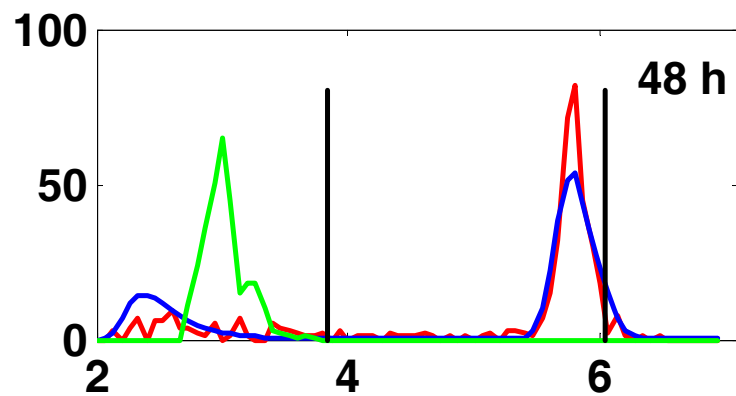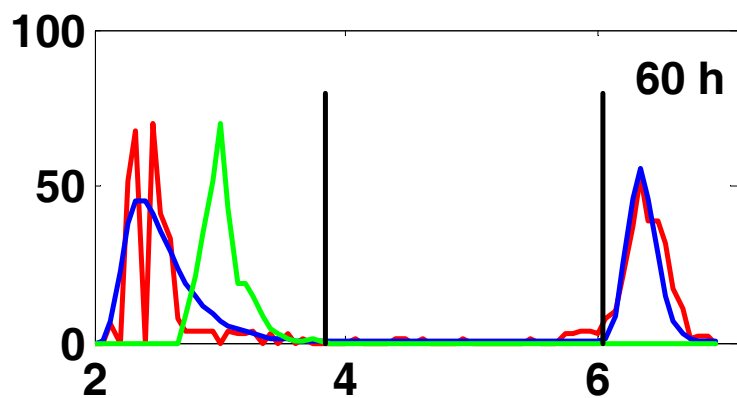

Suppl Fig 2d

log(EXT) units

dose level is 5

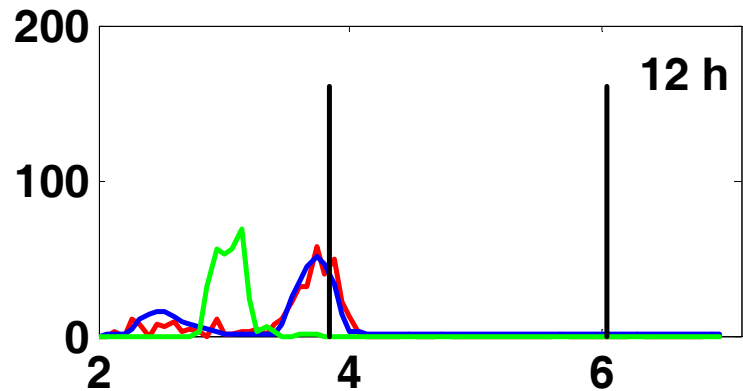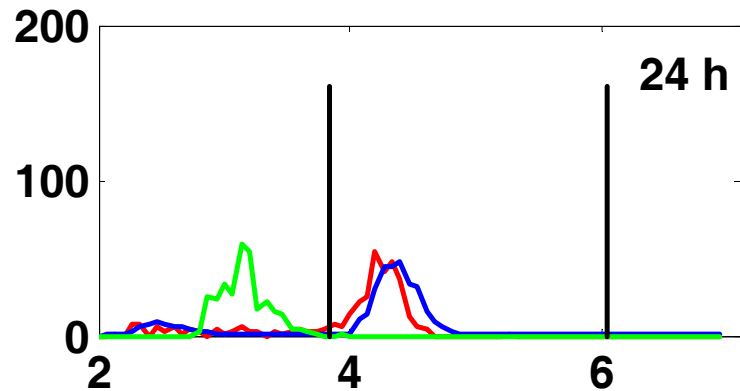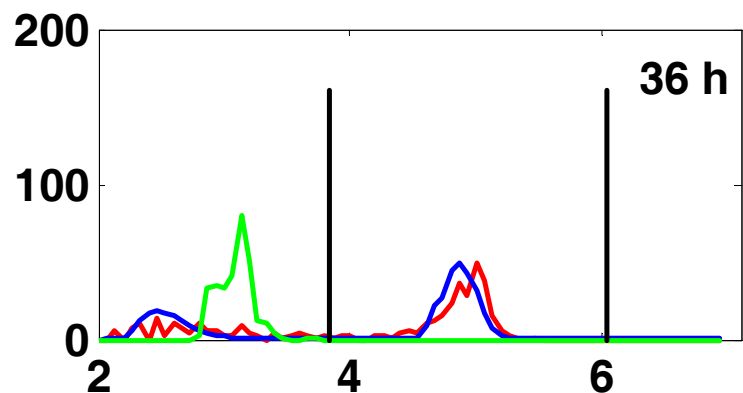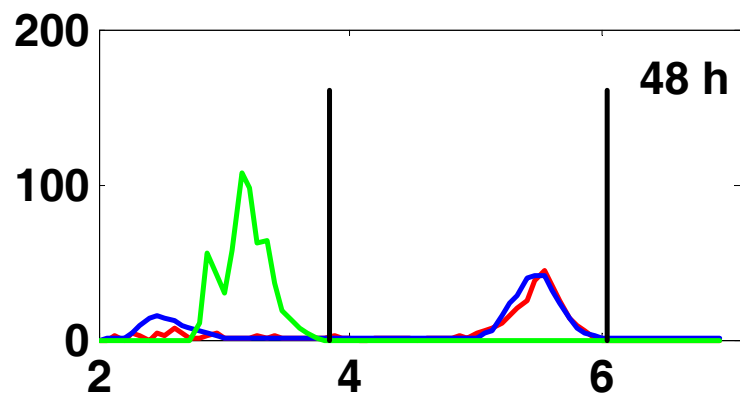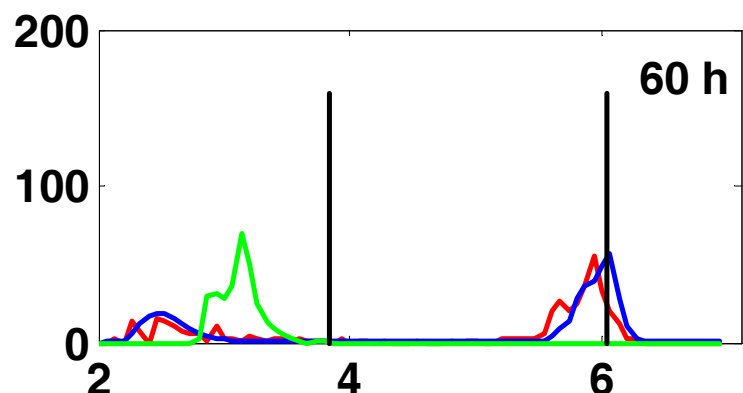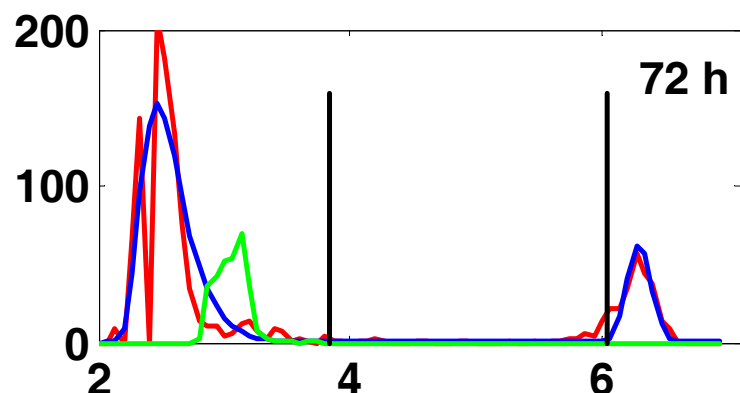

Suppl Fig 2e

log(EXT) units

log(EXT) units

dose level is 7.5

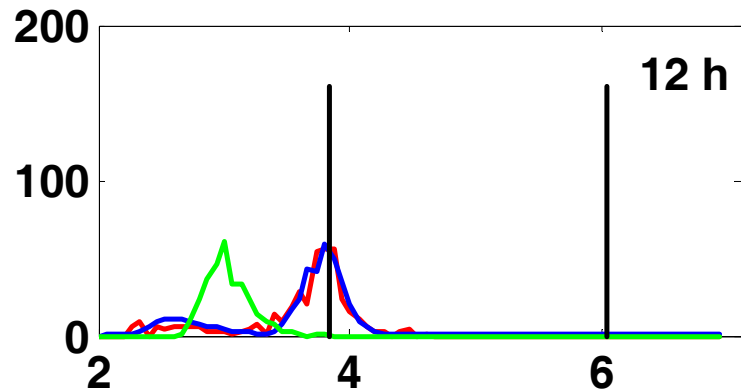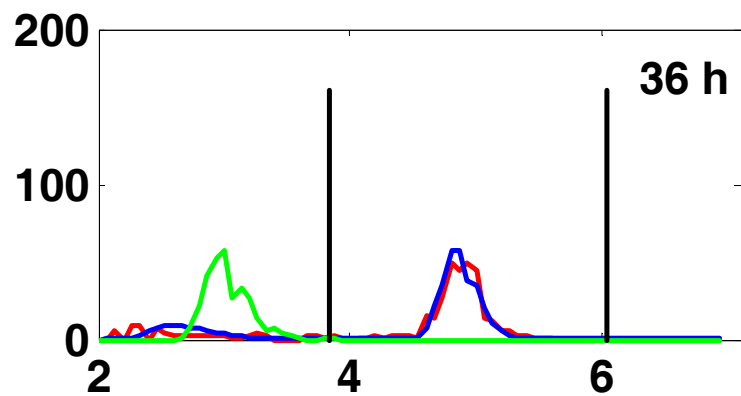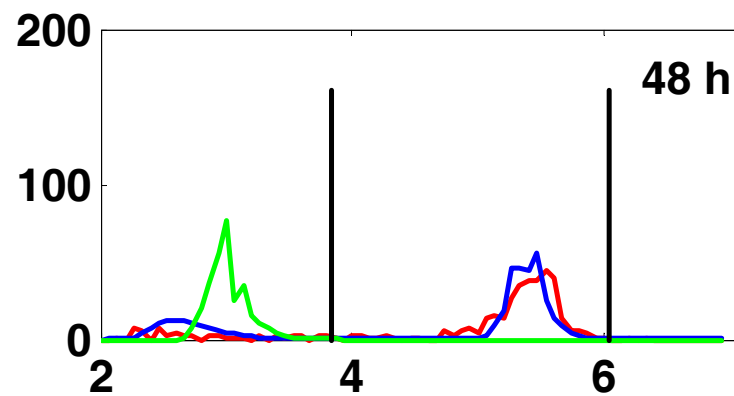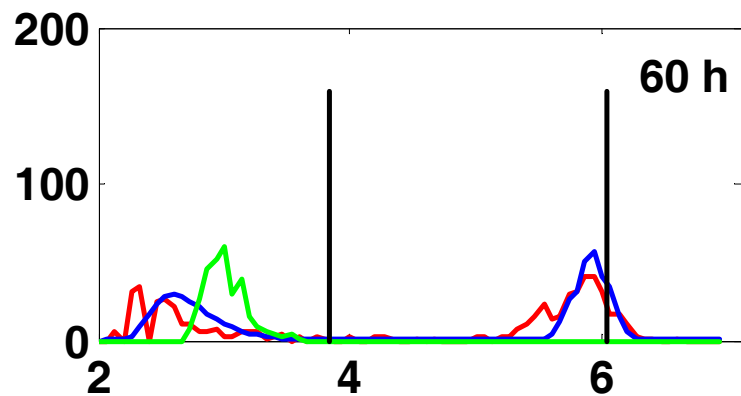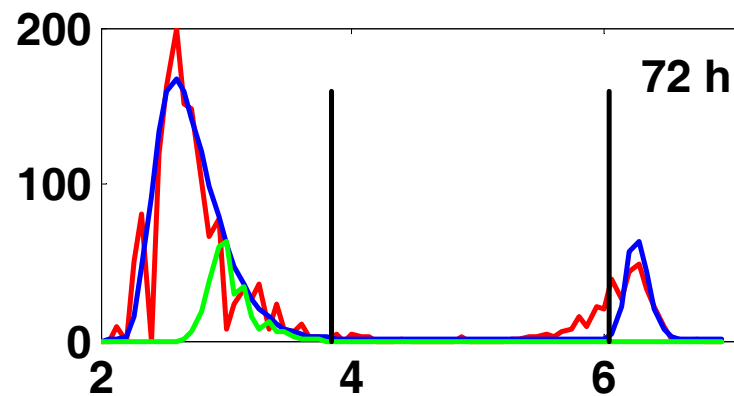

dose level is 15

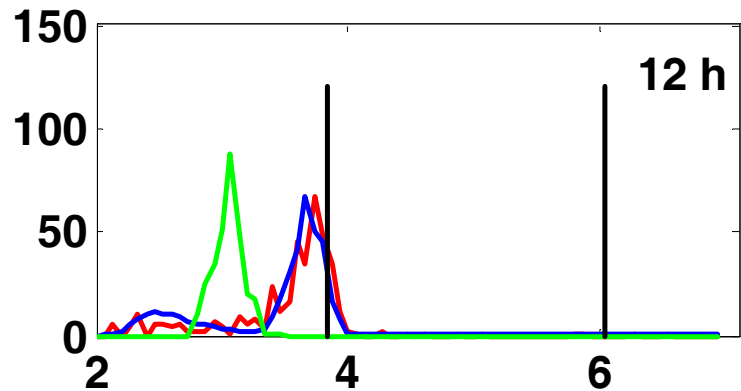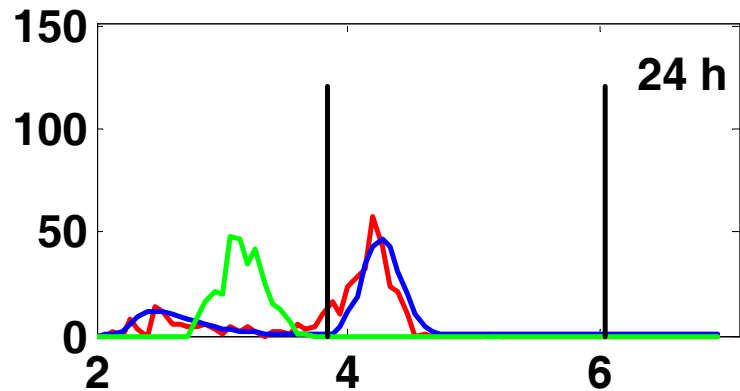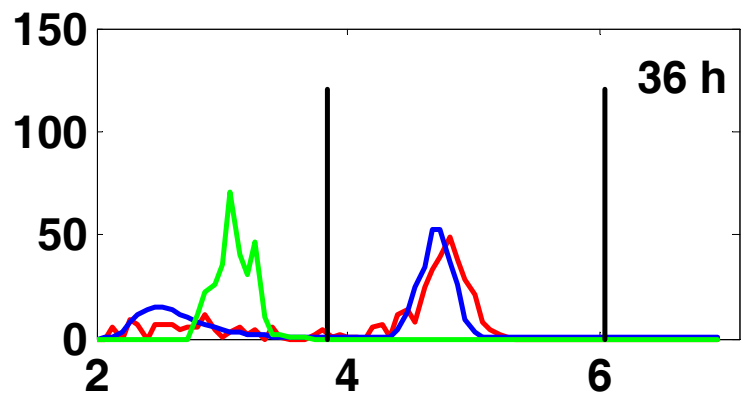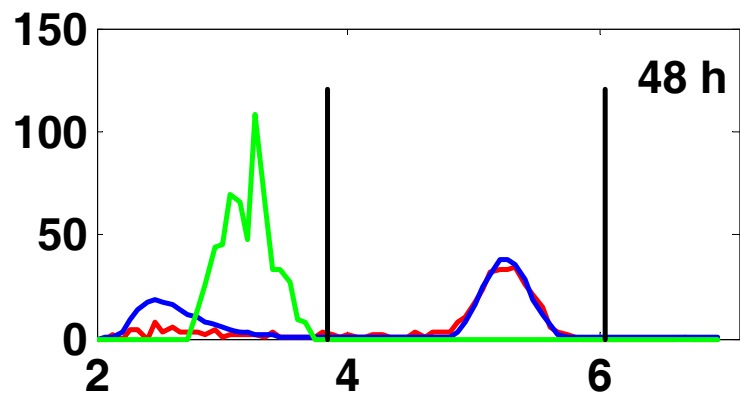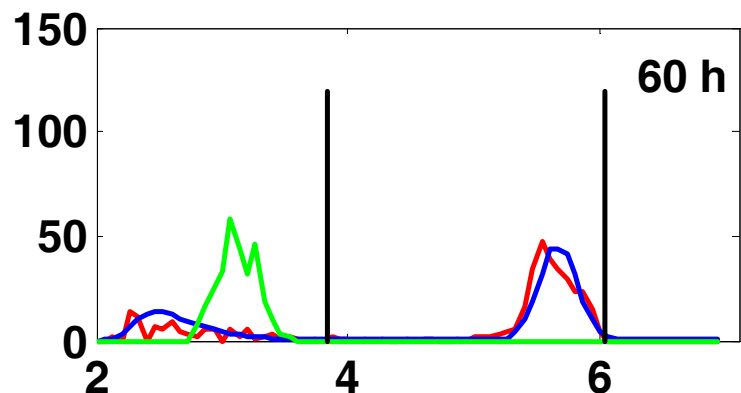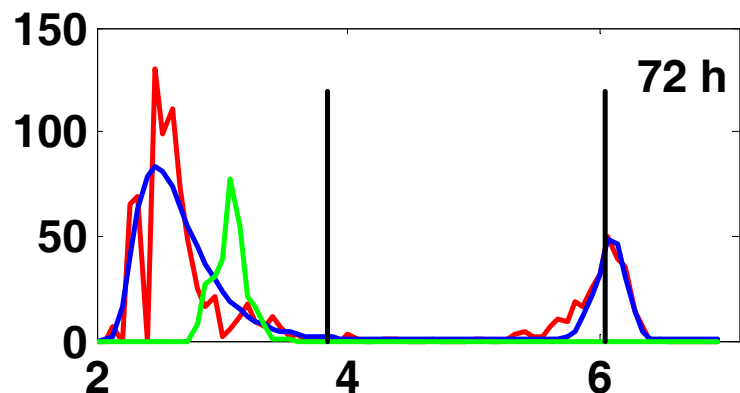



dose level is 22.5

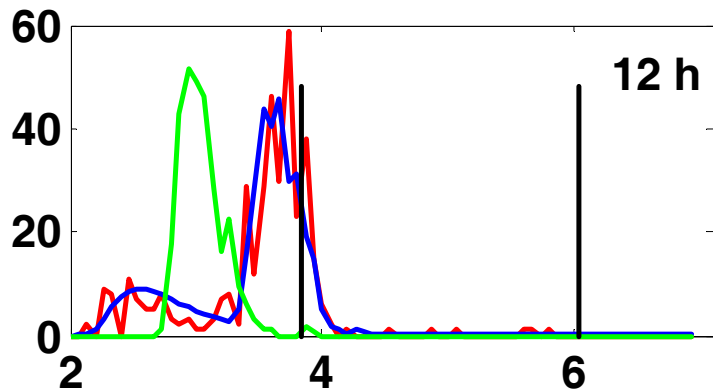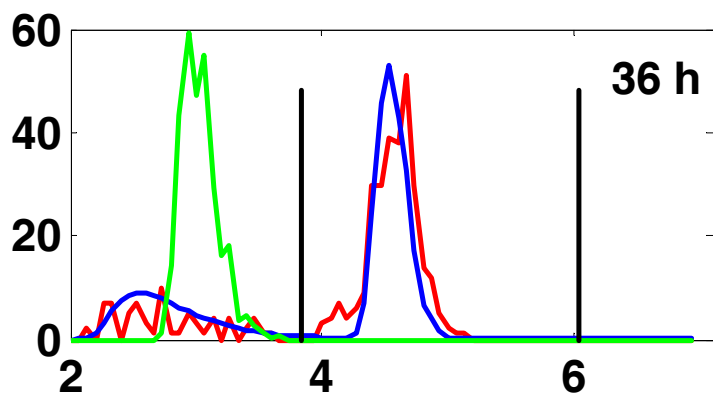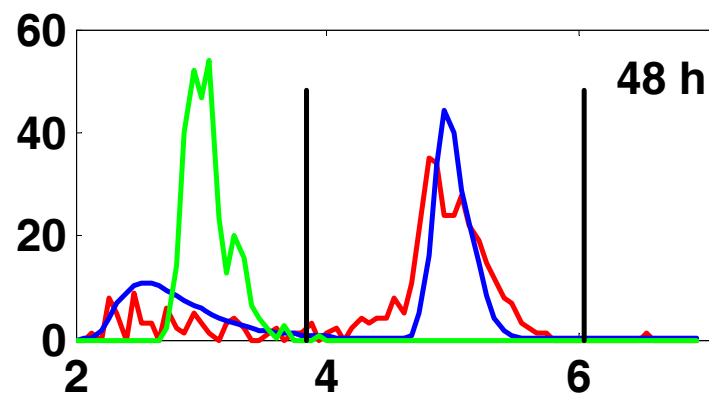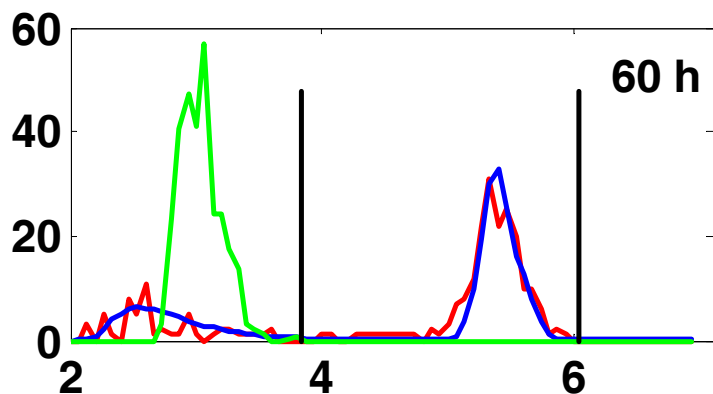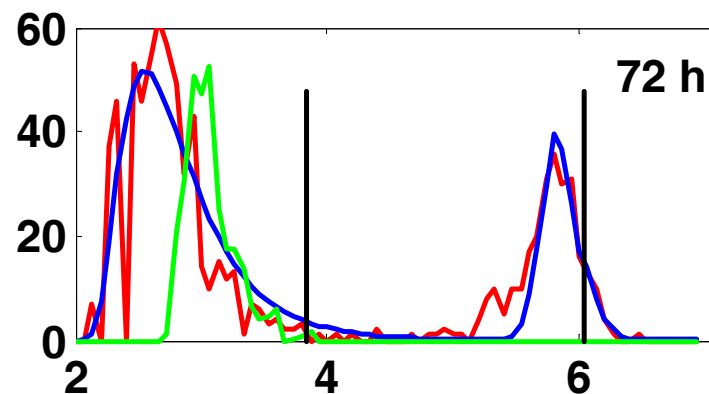

Suppl Fig 2h

log(EXT) units

log(EXT) units

dose level is 45

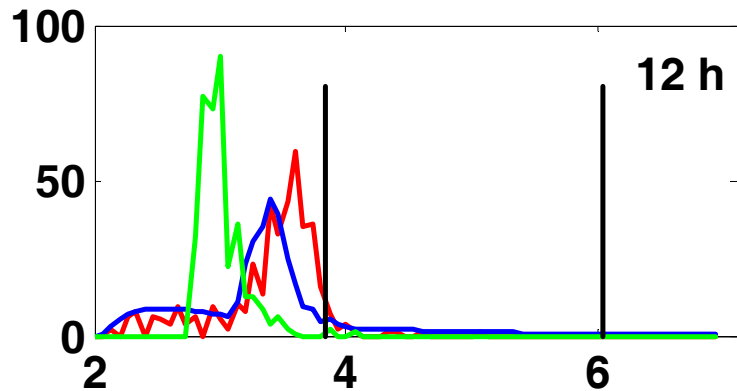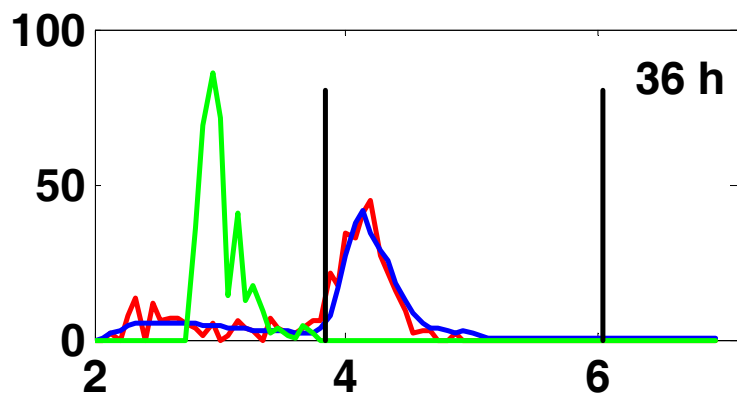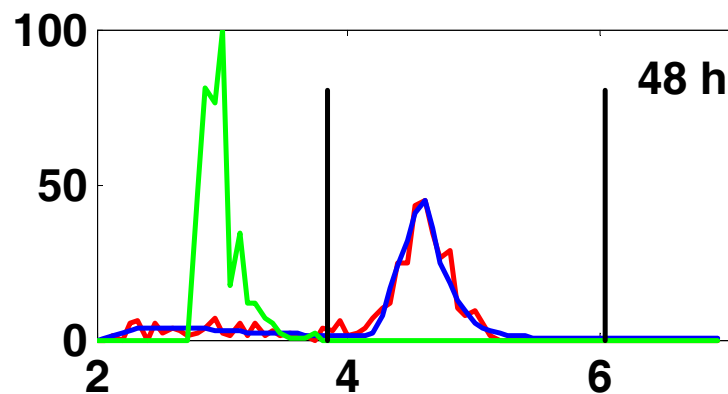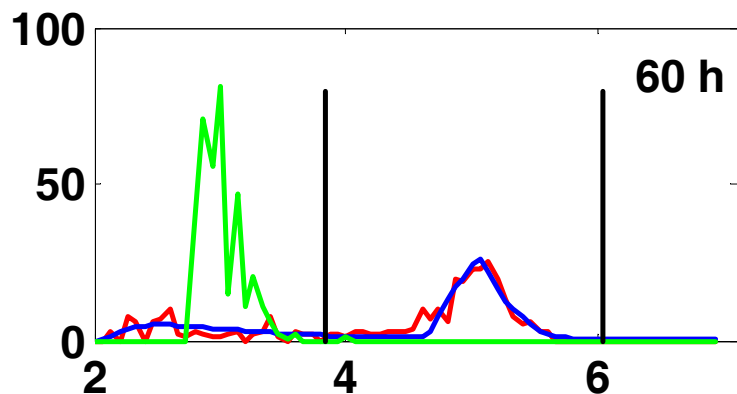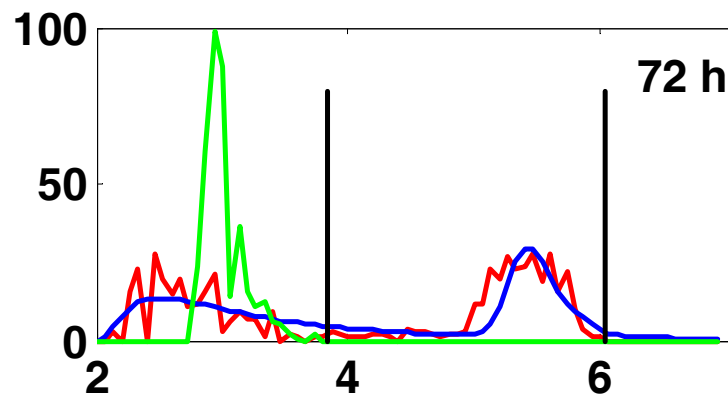

dose level is 50

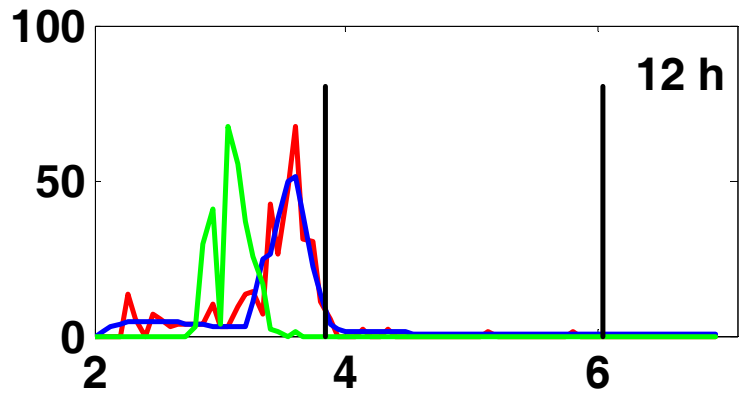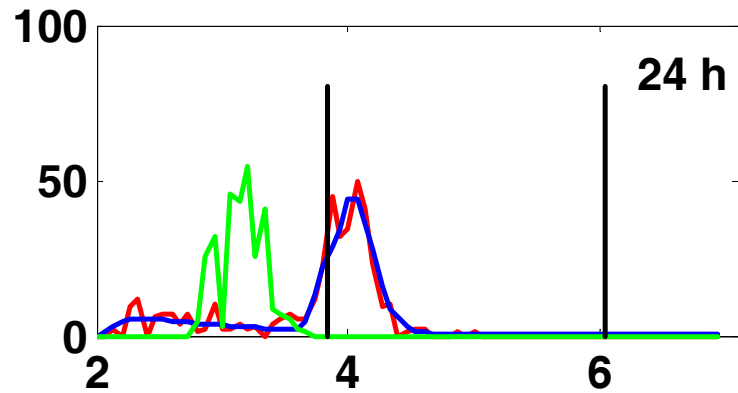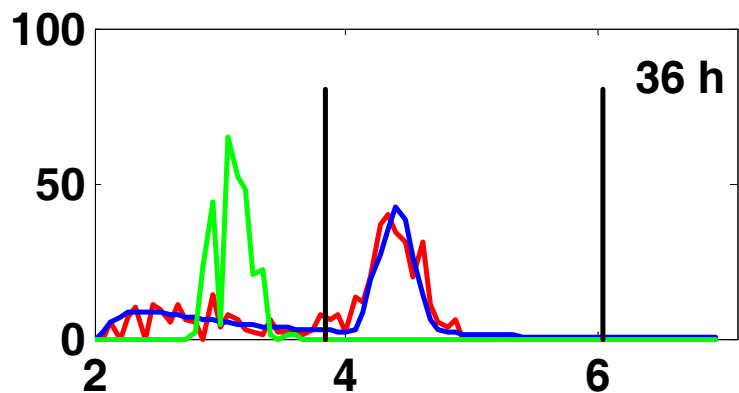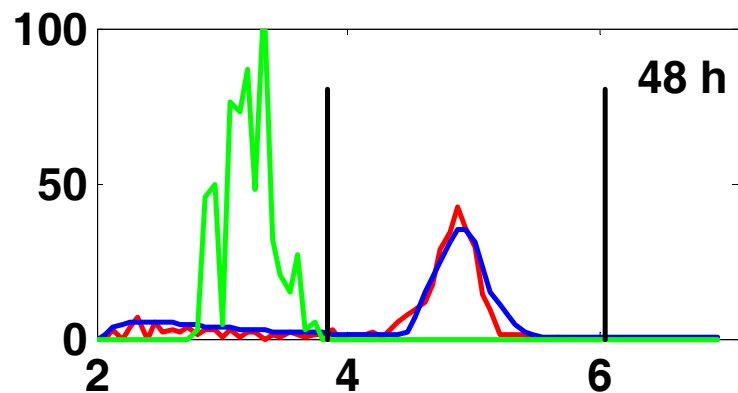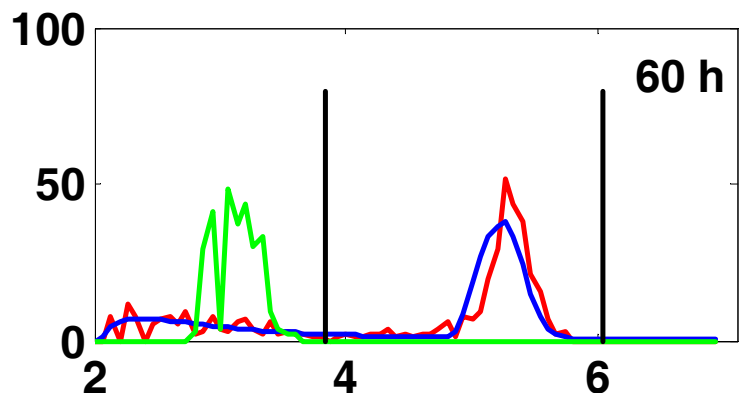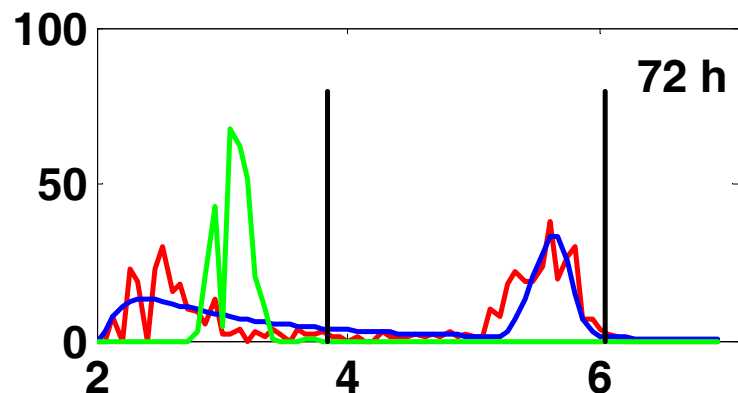

Suppl Fig 2j

log(EXT) units

log(EXT) units
