# Supplementary material for: Application of a Mathematical Model to Describe the Effects of Chlorpyrifos on Caenorhabditis elegans Development
Source: PubMed Central journal article supplement (PMC2737145; doi:10.1371/journal.pone.0007024), 2009-09-15
Supplement: pone.0007024.s004.pdf [file pone.0007024.s004.pdf]

## SUPPLEMENTARY FILE 4 - TABLES

**Table A1. Noise parameters for log(EXT) fit**

| Concentration<br>( $\mu\text{M}$ ) | Lognormal Parameters |        |
|------------------------------------|----------------------|--------|
| 0                                  | -0.4967              | 0.5553 |
| 0                                  | -0.7683              | 0.4176 |
| 0.50                               | -0.4685              | 0.5910 |
| 0.75                               | -0.7345              | 0.5130 |
| 5.00                               | -0.6329              | 0.3554 |
| 7.50                               | -0.3851              | 0.3648 |
| 15.0                               | -0.5255              | 0.4713 |
| 22.5                               | -0.3196              | 0.5186 |
| 30.0                               | -0.1526              | 0.9995 |
| 45.0                               | 0.0647               | 0.8632 |
| 50.0                               | 0.0205               | 1.0000 |

**Table A2. Estimated numbers of aspirated nematodes from fits to log(EXT) data**

| Concentration<br>( $\mu\text{M}$ ) | Time (hours) |     |     |     |     |     |
|------------------------------------|--------------|-----|-----|-----|-----|-----|
|                                    | 12           | 24  | 36  | 48  | 60  | 72  |
| 0                                  | 300          | 277 | 298 | 270 | 216 | *   |
| 0                                  | 300          | *   | 300 | 300 | 293 | *   |
| 0.50                               | 286          | 268 | 259 | 260 | 232 | *   |
| 0.75                               | 294          | *   | 261 | 300 | 236 | *   |
| 5.00                               | 259          | 291 | 257 | 279 | 269 | 226 |
| 7.50                               | 300          | *   | 292 | 275 | 286 | 229 |
| 15.0                               | 283          | 264 | 257 | 264 | 260 | 222 |
| 22.5                               | 269          | *   | 243 | 227 | 170 | 209 |
| 30.0                               | 242          | 274 | 198 | 270 | 256 | 196 |
| 45.0                               | 190          | *   | 256 | 278 | 187 | 210 |
| 50.0                               | 261          | 266 | 208 | 251 | 242 | 175 |

\*The model was not fit to these dose/time combinations

**Table A3. Estimated transfer probabilities for log(EXT) fit across all times**

| Concentration<br>( $\mu\text{M}$ ) | Probability |         |         |
|------------------------------------|-------------|---------|---------|
|                                    | 10 bins     | 11 bins | 12 bins |
| 0                                  | 0.2862      | 0.5849  | 0.1289  |
| 0                                  | 0.3590      | 0.3726  | 0.2684  |
| 0.50                               | 0.2036      | 0.6863  | 0.1100  |
| 0.75                               | 0.3092      | 0.4312  | 0.2595  |
| 5.00                               | 0.5881      | 0.0151  | 0.3968  |
| 7.50                               | 0.4768      | 0       | 0.5232  |
| 15.0                               | 0.4905      | 0.0535  | 0.4559  |
| 22.5                               | 0.5077      | 0       | 0.4923  |
| 30.0                               | 0.5213      | 0.0615  | 0.4172  |
| 45.0                               | 0.2255      | 0.1705  | 0.6040  |
| 50.0                               | 0.3906      | 0.1950  | 0.4143  |

**Table A4. Number of bins estimated for each section delineated by change points across all times**

| Concentration<br>( $\mu\text{M}$ ) | Section (log(EXT)) |               |               |
|------------------------------------|--------------------|---------------|---------------|
|                                    | 2.000 - 3.828      | 3.828 - 6.039 | 6.039 - 7.000 |
| 0                                  | 26                 | 38            | 27            |
| 0                                  | 24                 | 36            | 18            |
| 0.50                               | 28                 | 38            | 26            |
| 0.75                               | 24                 | 37            | 22            |
| 5.00                               | 29                 | 44            | 32            |
| 7.50                               | 26                 | 46            | 37            |
| 15.0                               | 32                 | 51            | 28            |
| 22.5                               | 32                 | 57            | 31            |
| 30.0                               | 39                 | 54            | 34            |
| 45.0                               | 57                 | 58            | 16            |
| 50.0                               | 44                 | 60            | 34            |

**Table A5. Noise parameters for log(TOF) fit**

| <b>Concentration<br/>(<math>\mu\text{M}</math>)</b> | <b>Lognormal Parameters</b> |        |
|-----------------------------------------------------|-----------------------------|--------|
| 0                                                   | -0.3441                     | 0.5360 |
| 0                                                   | -0.5845                     | 0.4040 |
| 0.50                                                | 0.4013                      | 1.5000 |
| 0.75                                                | -0.5463                     | 0.5087 |
| 5.00                                                | -0.4998                     | 0.3250 |
| 7.50                                                | -0.2906                     | 0.3305 |
| 15.0                                                | -0.4111                     | 0.4250 |
| 22.5                                                | 0.2864                      | 0.8927 |
| 30.0                                                | 0.1791                      | 0.8101 |
| 45.0                                                | 0.3338                      | 0.7187 |

**Table A6. Estimated transfer probabilities for log(TOF) fit across all times**

| <b>Concentration<br/>(<math>\mu\text{M}</math>)</b> | <b>Probability</b> |                |                |
|-----------------------------------------------------|--------------------|----------------|----------------|
|                                                     | <b>10 bins</b>     | <b>11 bins</b> | <b>12 bins</b> |
| 0                                                   | 0.3625             | 0.0000         | 0.6375         |
| 0                                                   | 0.3694             | 0.0725         | 0.5582         |
| 0.50                                                | 0.5008             | 0.0000         | 0.4992         |
| 0.75                                                | 0.2886             | 0.1129         | 0.5985         |
| 5.00                                                | 0.4092             | 0.0000         | 0.5908         |
| 7.50                                                | 0.3850             | 0.0730         | 0.5420         |
| 15.0                                                | 0.0234             | 0.2660         | 0.7106         |
| 22.5                                                | 0.0968             | 0.0059         | 0.8974         |
| 30.0                                                | 0.2075             | 0.0000         | 0.7925         |
| 45.0                                                | 0.4903             | 0.0390         | 0.4708         |

**Table A7. Estimated number of bins in each section as delineated by change points for log(TOF) measurements across all times**

| Concentration<br>( $\mu\text{M}$ ) | Section (log(TOF)) |               |               |
|------------------------------------|--------------------|---------------|---------------|
|                                    | 2.000 - 4.035      | 4.035 - 5.280 | 5.280 - 7.000 |
| 0                                  | 25                 | 27            | 57            |
| 0                                  | 32                 | 21            | 59            |
| 0.50                               | 27                 | 25            | 68            |
| 0.75                               | 30                 | 24            | 62            |
| 5.00                               | 31                 | 29            | 70            |
| 7.50                               | 30                 | 33            | 81            |
| 15.0                               | 32                 | 35            | 87            |
| 22.5                               | 37                 | 44            | 64            |
| 30.0                               | 38                 | 37            | 73            |
| 45.0                               | 41                 | 56            | 163           |

**Table A8. Fraction of aspirated nematodes with some degree of curling while being aspirated\***

| Concentration<br>( $\mu\text{M}$ ) | Section (log(TOF)) |               |               |
|------------------------------------|--------------------|---------------|---------------|
|                                    | 2.000 - 4.035      | 2.000 - 4.035 | 2.000 - 4.035 |
| 0                                  | 0.9500             | 0.4794        | 0.5584        |
| 0                                  | 0.6713             | 0.5083        | 0.4790        |
| 0.50                               | 0.9500             | 0.4579        | 0.4551        |
| 0.75                               | 0.7487             | 0.6530        | 0.3838        |
| 5.00                               | 0.6081             | 0.5703        | 0.7202        |
| 7.50                               | 0.5508             | 0.6354        | 0.9228        |
| 15.0                               | 0.5834             | 0.6621        | 0.9865        |
| 22.5                               | 0.5308             | 0.6522        | 0.9360        |
| 30.0                               | 0.6087             | 0.6877        | 0.9493        |
| 45.0                               | 0.2173             | 0.7620        | 0.0142        |

\*Fraction of all nematodes with some degree of curling while being loaded is 0.32.

**Table A9. Minimum fraction of length due to curling of log(TOF) measurement of aspirated nematodes across all times \***

| Concentration<br>( $\mu\text{M}$ ) | Section (log(TOF)) |               |               |
|------------------------------------|--------------------|---------------|---------------|
|                                    | 2.000 - 4.035      | 2.000 - 4.035 | 2.000 - 4.035 |
| 0                                  | 0.8775             | 0.6735        | 0.6691        |
| 0                                  | 0.6034             | 0.9902        | 0.7171        |
| 0.50                               | 0.7297             | 0.7255        | 0.6689        |
| 0.75                               | 0.5879             | 0.7981        | 0.7177        |
| 5.00                               | 0.6154             | 0.7367        | 0.7027        |
| 7.50                               | 0.6092             | 0.6825        | 0.6854        |
| 15.0                               | 0.5925             | 0.6663        | 0.6688        |
| 22.5                               | 0.7286             | 0.6716        | 0.7179        |
| 30.0                               | 0.6974             | 0.7505        | 0.6330        |
| 45.0                               | 0.7509             | 0.5842        | 0.9525        |

\*Minimum fraction of length for all loaded nematodes is 0.932
