# Supplementary material for: Application of a Mathematical Model to Describe the Effects of Chlorpyrifos on Caenorhabditis elegans Development
Source: PubMed Central journal article supplement (PMC2737145; doi:10.1371/journal.pone.0007024), 2009-09-15
Supplement: pone.0007024.s005.pdf [file pone.0007024.s005.pdf]

## SUPPLEMENTARY FILE 5

### EQUATIONS CORRESPONDING TO FIGURES 5 AND 6

| <b>Log(EXT) Growth Rates</b>                                     | <b>Log(TOF) Growth Rates</b>                                     |
|------------------------------------------------------------------|------------------------------------------------------------------|
| $g_1 = 0.0366e^{-0.0344dose} + 0.0303$                           | $g_1 = 0.045e^{-0.0142dose} + 0.0222$                            |
| $g_2 = 0.0234e^{-0.0542dose} + 0.0303$                           | $g_2 = 0.026e^{-0.0596dose} + 0.0222$                            |
| $g_3 = 0.0091e^{-0.5522dose} + 0.0303$                           | $g_3 = 0.0054e^{-1.2086dose} + 0.0222$                           |
| Expected time to 1 <sup>st</sup> change point = 9.8 + 0.21 dose  | Expected time to 1st change point = 9.8 + 0.09 dose              |
| Expected time to 2 <sup>nd</sup> change point = 53.5 + 0.73 dose | Expected time to 2 <sup>nd</sup> change point = 36.5 + 0.73 dose |
